1 **C24 sphingolipids play a surprising and central role in governing cholesterol**  
2 **and lateral organization of the live cell plasma membrane**

3

4

5 K. C. Courtney<sup>1</sup>, W. Pezeshkian<sup>2</sup>, R. Raghupathy<sup>3</sup>, C. Zhang<sup>3</sup>, A. Darbyson<sup>3</sup>, J. H. Ipsen<sup>2</sup>, D. A.  
6 Ford<sup>4</sup>, H. Khandelia<sup>2</sup>, J. F. Presley<sup>5</sup> and X. Zha<sup>1,3\*</sup>

7 <sup>1</sup>Department of Biochemistry, Microbiology & Immunology, University of Ottawa, 501 Smyth  
8 Road, Ottawa, Ontario, K1H 8L6, Canada.

9 <sup>2</sup>MEMPHYS, Center for Biomembrane Physics, University of Southern Denmark, Campusvej  
10 55, Odense 5230 M, Denmark

11 <sup>3</sup>Chronic Disease Program, Ottawa Hospital Research Institute, 501 Smyth Road, Ottawa,  
12 Ontario, K1H 8L6, Canada.

13 <sup>4</sup>Edward A. Doisy Department of Biochemistry and Molecular Biology, Saint Louis University  
14 School of Medicine, 1100 South Grand Blvd, St. Louis, MO, 63104, USA.

15 <sup>5</sup>Department of Anatomy and Cell Biology, McGill University, 3640 rue University, Montreal,  
16 H3A 0C7, Canada.

17

18 \*Correspondence: Xiaohui Zha ([xzha@ohri.ca](mailto:xzha@ohri.ca))

19

20

21

22

23 **Running title: C24 sphingolipids suppress membrane microdomains**

24

25

## 1 **Abstract**

2 Mammalian cell sphingolipids, primarily with C24 and C16 acyl chains, reside in the outer  
3 leaflet of the plasma membrane. Curiously, little is known how C24 sphingolipids impact  
4 cholesterol and membrane microdomains. Here, we generated giant unilamellar vesicles and live  
5 mammalian cells with C24 or C16 sphingomyelin exclusively in the outer leaflet and compared  
6 microdomain formation. In giant unilamellar vesicles, we observed that asymmetrically placed  
7 C24 sphingomyelin suppresses microdomains. Conversely, C16 sphingomyelin facilitates  
8 microdomains. Replacing endogenous sphingolipids with C24 or C16 sphingomyelin in live  
9 HeLa cells has a similar impact on microdomains, characterized by FRET between GPI-  
10 anchored proteins: C24, but not C16, sphingomyelin suppresses submicron domains in the  
11 plasma membrane. Molecular dynamics simulations indicated that, when in the outer leaflet, the  
12 acyl chain of C24 sphingomyelin interdigitates into the opposing leaflet, thereby favouring  
13 cholesterol in the inner leaflet. We indeed found that cholesterol prefers the inner over the outer  
14 leaflet of asymmetric unilamellar vesicles (80/20) when C24 sphingomyelin is in the outer  
15 leaflet. However, when C16 sphingomyelin is in the outer leaflet, cholesterol is evenly  
16 partitioned between leaflets (50/50). Interestingly, when a mixture of C24/C16 sphingomyelin is  
17 in the outer leaflet of unilamellar vesicles, cholesterol still prefers the inner leaflet (80/20).  
18 Indeed, in human erythrocyte plasma membrane, where a mixture of C24 and C16 sphingolipids  
19 are naturally in the outer leaflet, cholesterol prefers the cytoplasmic leaflet (80/20). Therefore,  
20 C24 sphingomyelin uniquely interacts with cholesterol and governs the lateral organization in  
21 asymmetric membranes, including the plasma membrane, potentially by generating cholesterol  
22 asymmetry.

23

## 24 **Statement of Significance**

25 The plasma membrane bilayer of mammalian cells has distinct phospholipids between the outer  
26 and inner leaflet, with sphingolipids exclusively in the outer leaflet. A large portion of  
27 mammalian sphingolipids have very long acyl chains (C24). Little is known how C24  
28 sphingolipids function in the outer leaflet. Mutations in the ceramide synthase 2 gene is found to  
29 decrease C24. This severely perturbs homeostasis in mice and humans. Here, we investigated  
30 unilamellar vesicles and mammalian cells with C24 sphingomyelin exclusively in the outer  
31 leaflet. We provide evidence that outer leaflet C24 sphingomyelin suppresses microdomains in  
32 model membranes and live cells by partitioning cholesterol into the inner leaflet. We propose  
33 that C24 sphingolipids are critical to the function of the plasma membrane.

34

## 1 **Introduction**

2 Lateral membrane microdomains, or lipid rafts, have long been regarded as a fundamental  
3 feature of the plasma membrane in mammalian cells (1). These domains are thought to be  
4 phase-separated from the more fluid environment of the bilayer membrane, primarily through  
5 spontaneous side-by-side associations of sphingolipids and cholesterol. In support of this  
6 hypothesis, micron-sized domains have been observed in giant unilamellar vesicles (GUVs) and  
7 giant plasma membrane vesicles (GPMVs) (2-4). Nevertheless, with the exception of transient  
8 nanodomains (5, 6), micron-sized domains have not been visualized in live mammalian cells.  
9 This has been attributed to protein/lipid interactions with the cytoskeleton and/or the complex  
10 membrane heterogeneity (7). Nevertheless, in contrast to most model membranes, a unique  
11 feature of the plasma membrane of live mammalian cells is their phospholipid asymmetry. One  
12 notable example is the asymmetrical distribution of sphingolipids, which reside almost  
13 exclusively in the outer leaflet (8, 9). Physiological sphingolipids primarily have two acyl  
14 chains, C16 and C24 (10). Our current understanding of cholesterol-sphingolipid interactions are  
15 primarily derived from model membranes made with C16 or C18 sphingomyelin (SM) in both  
16 leaflets, in contrast to physiological membranes (3, 11, 12). With their very long acyl chains,  
17 C24 sphingolipids have been observed to interact with cholesterol distinctly from C16  
18 sphingolipids (13), perhaps even more so in asymmetric membranes. Indeed, replacing C24 with  
19 C16 sphingolipids due to a mutation in ceramide synthase 2 (CerS2) was recently shown to result  
20 in metabolic defects in mouse models. In humans, genome-wide associations between similar  
21 mutations and metabolic syndrome have also been reported (14, 15). The precise mechanism for  
22 these defects is not known presently. However, it does suggest the critical importance of C24  
23 sphingolipids physiologically. In contrast to C16 sphingolipids, C24 sphingolipids have a unique

1 tendency for transbilayer interdigitation in bilayer membranes, due to the significant mismatch in  
2 length between the acyl chain and sphingosine backbone (16). Here, we investigated how C24  
3 SM interacts with cholesterol in asymmetric membranes and its impact on the lateral  
4 organization of GUVs and also on the plasma membrane in live mammalian cells.

## 5 **Results**

6 ***C24 SM suppresses microdomains in GUVs.*** We first examined the effect of C24 or C16 SM  
7 (milk or egg SM) on microdomain formation in three-component GUVs, a widely used model of  
8 the plasma membrane (3). Until recently, GUVs were only made of symmetric membranes (3).  
9 Without cholesterol, symmetric GUVs composed of DOPC<sup>\*</sup>/DPPC or DOPC/SM did not  
10 produce stable micron-sized domains (**Fig. 1A, a-c** & Supplementary Fig. 1). Introducing  
11 cholesterol into these symmetric GUVs led to phase separation, which can be visualized by the  
12 DPPE probes, with NBD-DPPE (green) in the liquid ordered phase ( $L_o$ ) and rhodamine-DPPE  
13 (red) in the lipid disordered phase ( $L_d$ ) (**Fig. 1A, d-f** & Supplementary Fig. 1). Cholesterol-  
14 containing symmetric GUVs with either C24 SM or C16 SM formed similar microdomains (**Fig.**  
15 **1A, e & f**) that were initially small but gradually coalesce into large domains (Supplementary  
16 **movie 1**). Thus C24 and C16 SM behaved similarly in symmetric membranes in terms of  
17 microdomain formation.

18 We next produced asymmetric GUVs by an exchange protocol (**Fig. 1B**) (17-19), taking  
19 advantage of the fact that phospholipids flip-flop slowly ( $t_{1/2}$  is usually days). This method can  
20 place either C24 or C16 SM exclusively in the outer leaflet (9). Remarkably, introducing C24  
21 SM into the outer leaflet of GUVs completely abolished the microdomains (**Fig. 1C, a**) at a wide

---

\* DPPC: dipalmitoyl-phosphatidylcholine; DOPC: dioleoyl-phosphatidylcholine; DPPE: dipalmitoyl-phosphatidylethanolamine

1 range of temperatures (3-37 °C) and cholesterol concentrations (0-50%) (Supplementary Fig. 2A  
2 & 2B). C16 SM, when similarly placed into the outer leaflet, persistently promoted  
3 microdomains (**Fig. 1C, b**), as in the symmetric membranes above (**Fig. 1A, e**). Moreover, if  
4 C24 SM asymmetry was destroyed by generating GUVs with equivalent lipid compositions as in  
5 **Fig. 1C, a**, except C24 SM were now in both leaflets, microdomains were formed again (**Fig.**  
6 **1C, c**). Furthermore, pure synthetic C24 SM in the outer leaflet abolished microdomains in  
7 asymmetric GUVs, but not synthetic C16 SM (**Fig. 1D**), clarifying that impurities in the natural  
8 C16 (egg) and C24 (milk) sphingomyelin played no significant role. Thus, C24 and C16 SM  
9 functions distinctively when placed asymmetrically in GUVs.

10 To further confirm that C24 SM in the outer leaflet is necessary to abolish the domains,  
11 we documented the following events. First, before outer leaflet lipid exchange, all symmetric  
12 acceptor GUVs (DPPC/DOPC/cholesterol) with rhodamine-DPPE (red) presented visible  
13 microdomains and donor-associated NBD-DPPE (green) was absent (**Fig. 1E, a**). Upon  
14 exchange (most rhodamine-DPPE in the outer leaflet is lost), acceptor GUVs acquired NBD-  
15 DPPE along with C24 SM from donors to the outer leaflet and, simultaneously, visible  
16 microdomains disappeared (**Fig. 1E, b**). Secondly, GUVs occasionally had smaller unilamellar  
17 vesicles inside (**Fig. 1F, a**). These encapsulated unilamellar vesicles did not have direct access  
18 to donor lipids and thus could not acquire NBD-DPPE (no green) or C24 SM (**Fig. 1F, b**). They  
19 retained their visible microdomains after exchange, even though their envelope GUV no longer  
20 had microdomains (**Fig. 1F, a**). Together, our data demonstrated a surprising role of C24 SM: it  
21 abolishes micron-sized domains, but only when placed exclusively in the outer leaflet of GUVs.  
22 SM with shorter acyl chains, such as C16 SM, continued to promote domains even when  
23 similarly present only in the outer leaflet of GUVs.

1 ***C24 SM also suppresses sub-micron domains in the plasma membrane of HeLa cells.*** We next  
2 asked whether C24 sphingolipids can similarly influence lateral organization in the plasma  
3 membrane of mammalian cells. For this, we performed FRET between CFP-and YFP-GPI-  
4 anchored proteins (APs) in live HeLa cells. These CFP and YFP GPI-APs do not form specific  
5 molecular-molecular interactions, i.e. dimerization or oligomerization (5). However, they both  
6 prefer  $L_0$  domains in model membranes and the live cell plasma membrane (20). Therefore, if  $L_0$   
7 domains formed in the plasma membrane, both CFP and YFP GPI-APs should become enriched  
8 in these micro or submicron domains. Under this scenario, FRET efficiency would be increased,  
9 relative to randomly distributed proteins. We first performed a theoretical simulation of FRET  
10 between randomly distributed CFP and YFP, which indicated to us that FRET could be detected  
11 in the range of protein density achievable in cultured cells and that FRET efficiency increases  
12 linearly with the density of acceptors in this density range (**Fig. 2A**). To experimentally test this,  
13 we co-expressed CFP-and YFP-GPI-APs in HeLa cells, followed by cholesterol depletion to  
14 generate a condition where the GPI-APs were known to be randomly distributed (21). We  
15 compared the experimental FRET data with the theoretical simulation. We found that the  
16 experimental FRET fit well within the simulation data and was mostly linear within this range of  
17 protein densities (**Fig. 2A**, inset, blue dots).

18 Our current understanding is that plasma membrane domains are too small to be optically  
19 resolved (22). However, the recruitment of CFP and YFP GPI-APs into submicron domains  
20 would increase the local density of the GPI-APs and, therefore, enhance the FRET efficiency  
21 between CFP- and YFP-GPI-APs. Thus, we envisioned that: (**a**) in the absence of domains:  
22 proteins are randomly distributed in the plasma membrane (**Fig. 2B, a**). The dependence of  
23 FRET on acceptor concentration (YFP) would be similar to the simulation (**Fig. 2B, c, line i**),

1 which is insensitive to any treatment that abolishes microdomains (i.e. cholesterol depletion); (**b**)  
2 in the case where submicron domains are present; CFP- and YFP-GPI APs become concentrated  
3 within  $L_o$  domains (**Fig. 2B, b**). This enhanced recruitment into submicron domains causes CFP-  
4 and YFP-GPI APs to be in closer proximity and, therefore, increases FRET efficiency (**Fig. 2B,**  
5 *c, line ii*), compared to randomly distributed proteins (*line i*). Also, the enhanced FRET should  
6 be highly sensitive to cholesterol depletion, as it will disperse submicron domains and put the  
7 GPI-anchored proteins into a random distribution, as in *line i*.

8 To understand how sphingolipid acyl chain length influences microdomains, we generated  
9 HeLa cells with C16 SM or C24 SM in the outer leaflet of the plasma membrane. This was  
10 achieved by first depleting all sphingolipids with myriocin and fumonisin b1 (M+F), which  
11 inhibits SM biosynthesis and ceramide synthase activity (23, 24). The cells were then  
12 replenished with C16 or C24 SM using SM/ $\gamma$ -CD complexes. As shown in **Fig. 3A**, native HeLa  
13 cells (DMSO) have both C16 and C24 sphingolipids with C24 sphingolipids being the most  
14 abundant. M+F depleted nearly all sphingolipids; subsequent supplementation successfully  
15 replenished the plasma membrane with C16 SM or C24 SM (Supplementary Fig. 3). Cells were  
16 viable and the replenished sphingolipids were indeed correctly inserted into the outer leaflet of  
17 the plasma membrane, verified by sphingomyelinase (SMase) induced endocytosis. SMase is  
18 known to hydrolyze sphingolipids in the outer leaflet of the plasma membrane and hence create  
19 an imbalance in the surface area between two leaflets, leading to spontaneous endocytosis (25),  
20 shown in control cells here (Supplementary Fig. 4). As expected, in cells depleted sphingolipids  
21 (M+F), SMase was not able to induce endocytosis. Critically, cells treated with M+F but  
22 subsequently supplemented with C16 or C24 SM were able to be triggered by SMase to  
23 endocytose (Supplementary Fig. 4). This demonstrates the availability of SM on the outer leaflet

1 of the plasma membrane. Thus, we concluded that we generated live cells with C16 or C24 SM  
2 in the outer leaflet of the plasma membrane, analogous to the asymmetric GUVs in **Fig. 1B**.

3 CFP- and YFP-GPI-APs were then expressed in the HeLa cells. The CFP- and YFP-GPI-  
4 APs were primarily localized on the plasma membrane (Supplementary Fig. 5), as reported  
5 previously (6, 20). We observed the highest FRET efficiency in cells replenished with C16 SM  
6 (**Fig. 3B**). Also, sphingolipid depleted cells (M+F) had similarly high FRET efficiency. This is  
7 consistent with our earlier observation in asymmetric GUVs: microdomains can form without  
8 SM or with C16 SM (**Fig. 1A, d & e**). In contrast, FRET efficiency is much less in the control  
9 cells (DMSO), which naturally have abundant C24 sphingolipids (**Fig. 3A**). Moreover, in  
10 contrast to cells with C16 SM, the cells that were replenished with C24 SM had low FRET  
11 efficiency, identical to the control cells. Importantly, cholesterol depletion decreased FRET most  
12 dramatically in C16 SM replenished cells and in sphingolipid depleted cells (M+F) (**Fig. 3C, b &**  
13 **c**), again in line with the existence of cholesterol-rich  $L_0$  submicron domains in these cells prior  
14 to cholesterol depletion. At the same time, cholesterol depletion produced little change in FRET  
15 in either C24 SM replenished or control cells (**Fig. 3C, a & d**), indicative of limited submicron  
16 domains in the native plasma membrane or the plasma membrane with C24 SM. Therefore, in  
17 the plasma membrane of untreated HeLa cells, submicron domains are less prominent than in  
18 cells without native sphingolipids or with C16 SM in the outer leaflet. Conversely, replenishment  
19 of C24 SM into the outer leaflet diminished the plasma membrane submicron domains and  
20 returned the cells to their native state.

21 We found that we had to express the GPI-AP at a relatively high density ( $\sim 1000/\mu\text{m}^2$ ) to  
22 achieve reliable density-dependent FRET. However, this density is less than 0.1% of membrane  
23 molecules (26), which is well within the range for labelling model membranes with fluorescent



1 phospholipid analogues (2). Furthermore, only C24 SM, not C16 SM, returned FRET to the  
2 level of untreated cells (**Fig. 3C, a & d**). It is thus plausible that the FRET experiments reported  
3 here reflect changes in submicron domains in the plasma membrane.

4 ***Molecular dynamics (MD) simulations and potential of mean force (PMF) suggest***

5 ***interdigitation of C24 SM and potential impact on cholesterol.*** The interaction between

6 cholesterol and SM is believed to be essential for membrane microdomain formation (7, 27).

7 However, asymmetrically placed C24, but not C16, SM unexpectedly abolished microdomains in

8 GUVs (**Fig. 1**) and suppressed submicron domains the live cell plasma membrane (**Fig. 3**). This

9 led us to speculate that C24 SM may interact with cholesterol differently from C16 SM. Indeed,

10 all-atom molecular dynamics (MD) simulations and potential of mean force (PMF) calculations

11 on asymmetric bilayers with either C16 or C24 SM in the outer leaflet (Supplementary Fig. 6)

12 demonstrated several striking differences (**Fig. 3A & 3B** and Supplementary Fig. 7-9). First,

13 cholesterol favours the inner leaflet (5.5  $k_B T$  less free energy) if C24 SM is in the outer leaflet

14 (**Fig. 4A, a** and Supplementary Fig. 7), whereas the SM containing leaflet is preferred by

15 cholesterol if C16 SM is in the outer leaflet (**Fig. 4B, a**). Secondly, the energy barrier for

16 cholesterol to flip from the outer to the inner leaflet is significantly smaller when C24 SM is in

17 the outer leaflet (6  $k_B T$ ), compared to that of C16 SM (15  $k_B T$ ). The effect of C24 SM was

18 equivalent when cholesterol was moving from the inner to outer leaflet or outer to inner leaflet

19 (Supplementary Fig. 8). Thus, energetically, cholesterol would favour the inner leaflet when C24

20 SM is in the outer leaflet. Moreover, the atom density profile indicates that the C24 SM acyl chain

21 from the outer leaflet significantly penetrates into the inner leaflet of the bilayer (**Fig. 4A, b, red**

22 *peak*); while C16 SM is fully contained within the outer leaflet (**Fig. 4B, b**) (Supplementary Fig. 7

23 for other phospholipids). We initially hypothesized that inner leaflet cholesterol would directly

1 interact with the interdigitated outer leaflet C24 SM acyl chain; however, we found no evidence  
2 of trans-bilayer stacking of cholesterol and C24 SM in opposing leaflets from an analysis of  
3 bilayer registry and two-dimensional density maps of cholesterol and SM in the bilayer plane  
4 (data not shown). Alternatively, we postulated that C24 SM acyl chain interdigitation would  
5 increase the density in the inner leaflet near the centre of the bilayer and induce mechanical  
6 instability by perturbing phospholipid packing. To compensate, cholesterol could either move  
7 into the inner leaflet to fill the gap and/or C24 SM would be pushed up towards the aqueous  
8 phase, which weakens outer leaflet C24 SM-cholesterol interactions. Consistent with this notion,  
9 the MD simulations indicated that C24 SM engages in weaker H-bonding with cholesterol in the  
10 outer leaflet than C16 SM (Supplementary Fig. 9). Weaker H-bonding was strongly correlated  
11 with reduced electrostatic interaction energy between C24 SM and cholesterol ( $-134 \pm 8$  kJ/mol),  
12 compared to C16 SM ( $-190 \pm 15$  kJ/mol). Outer leaflet C24 SM also exhibited higher  
13 electrostatic and Lennard-Jones interaction energies with the solvent molecules, compared to  
14 C16 SM, confirming that the C24 SM was indeed pushed up towards the aqueous phase in the  
15 asymmetric membranes (Supplementary Fig. 9H). Therefore, when C24 SM is in the outer  
16 leaflet, reduced H-bond capacity in the outer leaflet could further favour cholesterol in the inner  
17 leaflet, although other factors may also be contributing.

18 ***Development of a novel protocol to quantify cholesterol in each leaflet of large unilamellar***  
19 ***vesicles.*** We next proceeded to experimentally test the effect of C24 SM on cholesterol  
20 partitioning. Unlike phospholipids, cholesterol flip-flops rapidly between leaflets ( $t_{1/2} < \text{sec}$ )  
21 (11), which has greatly hindered the analysis of cholesterol partitioning in bilayer membranes. In  
22 order to quantify cholesterol partitioning, it was necessary to develop an experimental protocol to  
23 prevent cholesterol flip-flopping. Cholesterol was observed by electron spin resonance (ESR) to

1 stop rotating within phospholipid membranes at 0 °C (28). It was also reported that cholesterol  
2 movement, either within phospholipid membranes or between membranes, were prevented at 0  
3 °C regardless of membrane phospholipid compositions (29). Interestingly, methyl- $\beta$ -  
4 cyclodextrin (MCD), a high affinity cholesterol chelator, was seen to remove cholesterol from  
5 unilamellar vesicles at low temperature, albeit at slower rate (30). We postulated that MCD  
6 could specifically remove cholesterol from the outer leaflet of unilamellar vesicles at 0 °C, when  
7 cholesterol flip-flop was stopped. This concept was tested using symmetric large unilamellar  
8 vesicles (LUVs). Phospholipids and cholesterol in symmetric LUVs with diameter 100 nm  
9 should be evenly partitioned in each leaflet. Therefore, a valid analysis should detect cholesterol  
10 partitioned evenly, i.e. 50/50, between leaflets. Importantly, such 50/50 partitioning should be  
11 completely independent of phospholipid compositions of the LUVs.

12 We then carried out all the experiments at 0 °C under extremely stringent temperature  
13 control: all experiments were performed in the cold room in an ice-water bath (0 °C). In  
14 addition, all the utensils were pre-cooled in ice water so that no temperature change occurred  
15 during sample handling (see method for further detail). We first confirmed the unilamellar nature  
16 of LUVs (100 nm) (supplementary Fig. 10A). The LUVs used here only contain a trace amount  
17 of cholesterol (0.01%), so that the LUVs maintained their structural integrity after cholesterol  
18 removal (Supplementary Fig. 10B). It was also noted that, due to a tighter binding of cholesterol  
19 at lower temperature, cyclodextrins can sequester cholesterol highly efficiently at low  
20 temperature (30).

21 We then added membrane-impermeable MCD to the medium to extract cholesterol at 0 °C  
22 and 37 °C, respectively. If no cholesterol is flip-flopping between leaflets, for example at 0 °C,  
23 MCD should extract precisely 50% of the cholesterol from symmetric LUVs, regardless of

1 phospholipid composition. However, if cholesterol is allowed to freely flip-flop, as occurs at 37  
2 °C, all cholesterol (100%) is accessible to MCD (**Fig. 5A**). Indeed, this is exactly the case: MCD  
3 removed 53% ( $\pm 2.9$ ) at 0 °C and 100% cholesterol at 37 °C from symmetric LUVs (**Fig. 5B**),  
4 independent of phospholipid compositions, including LUVs with C24 SM (**Fig. 5C-E**).  
5 Furthermore, MCD also extracted precisely 50% cholesterol from symmetric LUVs at -5 °C (in  
6 an ethylene glycol bath) (**Fig. 5F**). This further confirms that MCD is able to extract cholesterol  
7 at 0 and -5 °C, which is solely dependent upon the sidedness of the cholesterol, rather than  
8 interactions with phospholipids. We, therefore, concluded that we established a valid protocol to  
9 prevent cholesterol flip-flop, which can be used to quantify cholesterol partitioning in LUVs.

10 ***C24 SM in the outer leaflet concentrates cholesterol into the inner leaflet in large unilamellar***  
11 ***vesicles.*** We next generated asymmetric LUVs with C24, C16, or C18 SM in the outer leaflet,  
12 which were validated by anisotropy and mass spectrometry (Supplementary Fig. 11).  
13 Remarkably, when C24 SM was in the outer leaflet, MCD could only maximally remove 20%  
14 cholesterol at 0 °C (**Figure 6A**). This suggests that 80% of the cholesterol is inaccessible to  
15 MCD, i.e. in the inner leaflet. Moreover, if these asymmetric LUVs were dissolved, lyophilized  
16 and reformed into symmetric vesicles (C24 SM in both leaflets or “scrambled”), MCD again  
17 removed 50% of the cholesterol (**Fig. 6A**, inset). Thus, the most plausible interpretation is that  
18 C24 SM in the outer leaflet caused cholesterol to become partitioned 80/20 between the inner  
19 and outer leaflet at 0 °C.

20 Asymmetric LUVs with C16 SM, C18 SM (brain SM), or PC in the outer leaflet  
21 maintained the 50/50 cholesterol partitioning, as in symmetric LUVs (**Fig. 6B-D**). Furthermore,  
22 in LUVs with C24 SM in the outer leaflet, inner leaflet PE or PS seemed to contribute little to the  
23 80/20 cholesterol partitioning in our experimental setting (**Fig. 6E**). Perhaps most importantly,

1 when a mixture of both C24 SM and C16 SM (50/50) were placed in the outer leaflet, LUVs still  
2 exhibited the 80/20 cholesterol partitioning (**Fig. 6F**), identical to the experiments with only C24  
3 SM in the outer leaflet. This indicates that C24 SM plays a more dominant role than C16 SM in  
4 cholesterol partitioning, which could be of physiological significance. We found that, in most  
5 mammalian cells, C24 sphingolipids are a major species, with C16 sphingolipid being less  
6 abundant (Supplementary Fig. 12).

7 ***C24 SM, when in the outer leaflet, also concentrates cholesterol in the inner leaflet in***  
8 ***cholesterol-rich LUVs.*** Mammalian plasma membrane has C24, along with C16, sphingolipids  
9 naturally in the outer leaflet (10) and is also cholesterol rich (~30-40 %). The MCD extraction  
10 protocol above, while sufficient to demonstrate that cholesterol flip-flopping is prevented at 0 °C,  
11 could not be used with cholesterol-rich membranes. Removing large quantities of cholesterol  
12 from cholesterol-rich LUVs (30%) would surely compromise membrane integrity. We hence  
13 employed an exchange protocol between cholesterol-rich donor and acceptor LUVs, which are  
14 identical except the donor LUVs contained a trace amount of <sup>3</sup>H-cholesterol (11). A low  
15 concentration of βCD was used as a shuttle to facilitate cholesterol exchange between donor and  
16 acceptor LUVs (100 fold in excess) (**Fig. 7A**). This system allows cholesterol to exchange  
17 between donor and acceptor LUVs without net mass flow, rather than direct extraction by MCD.  
18 Donor LUVs were also biotinylated and bound to streptavidin-coated beads to facilitate  
19 separation from the acceptor LUVs in the supernatant. The amount of <sup>3</sup>H-cholesterol that is  
20 accessible to exchange (i.e. in the outer leaflet of the donor LUVs at 0 °C) will be transferred to  
21 acceptor LUVs and quantified. The protocol was first validated with symmetric LUVs with 30 %  
22 cholesterol. We indeed found that 50 % of the <sup>3</sup>H-cholesterol was exchangeable at 0 °C and 100  
23 % at 37 °C (**Fig. 7B**). However, if C24 SM was introduced into the outer leaflet, these

1 cholesterol-rich LUVs only had 20% of the <sup>3</sup>H-cholesterol accessible for exchange at 0 °C (**Fig.**  
2 **7C**), again suggesting that 80 % of the cholesterol was shielded from exchange, consistent with  
3 enriched partitioning into the inner leaflet. This result is also correlated with the disappearance of  
4 microdomains in asymmetric C24 SM GUVs (**Fig. 1C, a**). Taken together, our observations from  
5 both cholesterol-poor and -rich LUVs are consistent with the notion that outer leaflet C24 SM is  
6 a sufficient factor to partition cholesterol into the inner leaflet of asymmetric LUVs.

7 *Live human erythrocytes have substantial amounts of C24 sphingolipids and cholesterol is*  
8 *partitioned 80/20 in the plasma membrane.* We next applied the cholesterol exchange protocol  
9 to human erythrocytes. Erythrocytes lack internal membranous organelles and are essentially  
10 mammalian plasma membranes with predominately C24 sphingolipids (Supplementary Fig. 13).  
11 In fact, erythrocytes were instrumental for studies that established phospholipid asymmetry of  
12 the plasma membrane, including that of sphingolipids (8, 9, 31). As in LUVs above, we labelled  
13 donor erythrocytes with <sup>3</sup>H-cholesterol. Cells were also biotinylated to be adhered to  
14 streptavidin-coated dishes. 100-fold unlabeled erythrocytes were added to the dish as acceptors,  
15 again in the presence of βCD. This donor-acceptor system again is preferable over direct  
16 cholesterol extraction (32) to minimize perturbing the native cholesterol concentration and avoid  
17 haemolysis. We found that only 20 % of the erythrocyte cholesterol was exchangeable at 0 °C  
18 and 100% at 37 °C (**Fig. 7D**). The erythrocytes remained intact during the cholesterol exchange  
19 (Supplementary Fig. 13C). Thus, in the plasma membrane of erythrocytes, approximately 80% of  
20 the cholesterol is shielded from exchange at 0 °C, consistent with enriched partitioning into the  
21 cytoplasmic leaflet. It should be noted that this 80/20 cholesterol partitioning at 0 °C may not  
22 reflect the precise degree of partitioning at physiological temperatures. Nevertheless, only C24  
23 SM in the outer leaflet of asymmetric LUVs produced the 80/20 partitioning at 0 °C (**Fig. 6A** and

1 **7C**), which is correlated with disappearance of microdomain in GUVs at physiological  
2 temperature. The shorter acyl chain SMs did not produce anything other than 50/50 cholesterol  
3 partitioning at 0 °C and did not suppress microdomains in GUVs at physiological temperature.  
4 Furthermore, the MD simulations suggest a preferential partitioning of cholesterol into the inner  
5 leaflet at 37 °C, if C24 SM is in the outer leaflet. Intriguingly, studies using fluorescent  
6 cholesterol analogs on nucleated mammalian cells similarly found 80/20 partitioning in the  
7 plasma membrane at physiological temperature (33, 34).

## 8 **Discussion**

9 Taken all observations above together, we propose that C24 sphingolipids, one of the  
10 major species of sphingolipids in mammalian cells, have two unique functions on asymmetric  
11 membranes, including the plasma membrane. First, when present exclusively in the outer leaflet,  
12 C24 sphingolipids most likely enrich cholesterol in the inner or cytoplasmic leaflet (**Fig. 6A &**  
13 **7C**). A strong interdigitation into the inner leaflet by the outer leaflet C24 sphingolipids is a  
14 potential mechanism (**Fig. 4** and Supplementary Fig. 7) (13). Such interdigitation would reduce  
15 H-bonding between C24 SM and cholesterol in the outer leaflet and also perturb phospholipid  
16 packing in the inner leaflet, generating instability in the membrane (Supplementary Fig. 9). By  
17 localizing into the inner leaflet, cholesterol not only fills the potential hydrophobic cavity and  
18 thus stabilizes the membrane, but also avoids reduced H-bonding with C24 sphingolipid in the  
19 outer leaflet, both of which lead to a more stable state for cholesterol in the inner leaflet (lower  
20 energy as shown in **Fig. 4A, a**). Importantly, we observed that, even with equal amounts of C24  
21 SM and C16 SM in the outer leaflet, cholesterol continues to prefer the inner leaflet (**Fig. 6F**),  
22 the state that is energetically more favourable (**Fig. 4A, a & b**).

1           Secondly, asymmetrically placed C24 SM suppresses microdomains in GUVs (**Fig. 1**).  
2   This function is strictly correlated with the preferential partitioning of cholesterol into the inner  
3   leaflet of unilamellar vesicles, as shown by cholesterol partitioning experiments (**Fig. 6A**) and  
4   MD simulations (**Fig. 4**). Our observations by FRET in live cells are also consistent with the  
5   notion that C24 SM, naturally in the outer leaflet, limits the formation of submicron domains in  
6   the plasma membrane (**Fig. 3**). We speculate that this could be a consequence of more  
7   cholesterol partitioning in to the inner leaflet. In the absence of C24 SM interdigitation (e.g.,  
8   sphingolipid depletion or C16 SM supplementation), cholesterol asymmetry may be altered in  
9   the plasma membrane and promote the formation of submicron domains.

10           The partitioning of cholesterol in erythrocytes, shown in **Fig. 7D**, fully supports studies  
11   on the partitioning of fluorescent cholesterol analogues, dehydroergosterol and cholestatrienol  
12   (33, 34). These studies used a membrane impermeable reagent to collisionally quench the sterol  
13   fluorescence from either side of the membrane, thereby fully preserving the native partitioning  
14   and flip-flopping dynamics of cholesterol analogues. Unfortunately, most other studies that  
15   characterized cholesterol partitioning, or sidedness, relied upon enzymatic reactions or protein  
16   probes that form complexes with cholesterol. These approaches would invariably take  
17   cholesterol out of their rapidly equilibrium pools and, therefore, perturb the native partitioning of  
18   cholesterol (35, 36). In contrast, our 0 °C protocol was specifically designed not to perturb the  
19   native cholesterol distribution. The fact that we reached similar conclusions as the fluorescence  
20   quenching studies should also greatly strengthen the conclusion. Moreover, by using native  
21   cholesterol, the current study represents another major advance from cholesterol analogues.

22           Perhaps most importantly, we are able to establish a correlation between the cholesterol  
23   partitioning and the formation of microdomains in GUVs. It is attempting to speculate that, the



1 enrichment of cholesterol in the cytoplasmic leaflet of the plasma membrane, as seen in  
2 erythrocytes, could create a cholesterol poor outer leaflet. At the same time, the inner leaflet  
3 could have a high concentration of cholesterol. Neither of these cases would favour stable  
4 microdomains in model membranes (3). This could potentially explain why only transient and  
5 nano-scale domains have been reported in live cell plasma membranes. Our FRET study also  
6 could only detect minimal submicron domains in control cells.

7         The cholesterol partitioning or sidedness analysis presented here was carried out using  
8 the 0 °C protocol to essentially “freeze” cholesterol flip-flopping. Our conclusions primarily rely  
9 on MCD accessibility to cholesterol in unilamellar vesicles at 0 °C, which entirely depends on  
10 the sidedness of cholesterol. Cholesterol accessibility by MCD is not influenced by  
11 phospholipids: all symmetric vesicles with various phospholipid compositions, including those  
12 made with C24 SM (**Fig. 5E**), universally produce precisely 50 % cholesterol extraction by  
13 MCD. This is a strong validation of the protocol. It is, therefore, highly unlikely that C24 SM in  
14 the outer leaflet of an asymmetric membrane could hinder cholesterol extraction by MCD.

15         The precise degree of native cholesterol asymmetry in the plasma membrane at  
16 physiological temperature remains to be determined. It is possible that the interaction between  
17 phospholipids and cholesterol could differ between 0 °C and physiological temperature. For  
18 example, low temperature could potentially cause cholesterol to associate stronger with the inner  
19 leaflet lipids, such as PE and PS, compared to outer leaflet SM and PC. As such, cholesterol  
20 could become trapped in the inner leaflet when C24 SM is in the outer leaflet. However, only  
21 C24 SM was found to disperse microdomains in the asymmetric GUVs and also the submicron  
22 domains in live mammalian cells at physiological temperature. Conversely, C16 SM promoted  
23 GUV microdomains and submicron plasma membrane domains and was also unable to shift the

1 cholesterol partitioning at 0 °C. Regardless of the precise degree of cholesterol partitioning, the  
2 unique property of C24 SM on microdomains at physiological temperature is correlated with its  
3 influence on cholesterol partitioning at 0 °C. Given the results from the MD simulations and  
4 quenching of fluorescent cholesterol analogues, it is likely that outer leaflet C24 SM causes  
5 cholesterol to favour the inner leaflet, even at physiological temperature.

6 Another issue here is the role of the major inner leaflet lipids, PS and PE. PS was found  
7 to impact nano-domains in the plasma membrane (21), as well as, the binding of D4 (a  
8 perfringolysin O sterol binding domain) to the cytoplasmic leaflet (37). PE was also speculated  
9 to influence the partitioning of cholesterol in a bilayer due to effects on membrane curvature  
10 (38). However, we did not observe a significant role of PS or PE in LUV cholesterol partitioning  
11 (**Fig. 6E**). Nevertheless, removing these amino-phospholipids in asymmetric LUVs did show a  
12 minor trend to reverse the C24 SM effect (**Fig. 6E**), though failed to reach statistical significance  
13 in our experimental system. If PS and PE also favour inner leaflet cholesterol partitioning, this  
14 would provide another force to retain cholesterol in the inner leaflet, in addition to the effect of  
15 outer leaflet C24 sphingolipids.

16 Most mammalian cells have a significant amount of C24 along with C16 sphingolipids  
17 (Supplementary Fig 12). This suggests that our observations here may have broad physiological  
18 implications. Indeed, switching C24 to C16 sphingolipids by changes in CerS2 expression was  
19 found to be associated with metabolic syndrome, cancer and neurodegeneration in humans (14,  
20 15, 39, 40). One of the potential consequences of altering the C16/C24 sphingolipid ratio could  
21 impact on the native cholesterol sidedness in the plasma membrane, i.e. more cholesterol in the  
22 outer leaflet. This would change the dynamics of plasma membrane microdomains and,  
23 consequently, protein-protein interactions, contributing to the development of disease.

1 **Materials and Methods**

2

3        Phospholipids and liposome accessories were purchased from Avanti Polar Lipids.

4        Cholesterol, trinitrobenzenesulphonic acid (TNBS) and all cyclodextrins used were purchased

5        from Sigma-Aldrich. Radiolabelled ( $^3\text{H}$ ) cholesterol was purchased from Perkin Elmer. TMA-

6        DPH was purchased from Molecular Probes. Naphtho[2,3-a]pyrene was purchased from Santa

7        Cruz Biotechnologies. Thin layer chromatography plates were acquired from Cedarlane

8        Laboratories. The transfection reagent, Attractene, was purchased from Qiagen. Platinum wire

9        was purchased from Omega Engineering. All other materials and reagents were purchased from

10       Fisher Scientific.

11       Additional information on materials and methods can be found in Supplementary

12       Information (SI) Materials and Methods.

13

14

## 1   **References**

- 2   1.    Simons K & Gerl MJ (2010) Revitalizing membrane rafts: New tools and insights.  
3       *Nature Reviews Molecular Cell Biology* 11(10):688-699.
- 4   2.    Baumgart T, Hess ST, & Webb WW (2003) Imaging coexisting fluid domains in  
5       biomembrane models coupling curvature and line tension. *Nature* 425(6960):821-824.
- 6   3.    Veatch SL & Keller SL (2003) Separation of Liquid Phases in Giant Vesicles of Ternary  
7       Mixtures of Phospholipids and Cholesterol. *Biophysical Journal* 85(5):3074-3083.
- 8   4.    Baumgart T, *et al.* (2007) Large-scale fluid/fluid phase separation of proteins and lipids  
9       in giant plasma membrane vesicles. *Proceedings of the National Academy of Sciences of*  
10      *the United States of America* 104(9):3165-3170.
- 11  5.    Sharma P, *et al.* (2004) Nanoscale organization of multiple GPI-anchored proteins in  
12      living cell membranes. *Cell* 116(4):577-589.
- 13  6.    Varma R & Mayor S (1998) GPI-anchored proteins are organized in submicron domains  
14      at the cell surface. *Nature* 394(6695):798-801.
- 15  7.    Edidin M (2003) The state of lipid rafts: From model membranes to cells. in *Annual*  
16      *Review of Biophysics and Biomolecular Structure*, pp 257-283.
- 17  8.    Verkleij AJ, *et al.* (1973) The asymmetric distribution of phospholipids in the human red  
18      cell membrane. A combined study using phospholipases and freeze-etch electron  
19      microscopy. *BBA - Biomembranes* 323(2):178-193.
- 20  9.    Boegheim Jr JPJ, Van Linde M, Op Den Kamp JAF, & Roelofsen B (1983) The  
21      sphingomyelin pools in the outer and inner layer of the human erythrocyte membrane are  
22      composed of different molecular species. *Biochimica et Biophysica Acta - Biomembranes*  
23      735(3):438-442.
- 24  10.   Gerl MJ, *et al.* (2012) Quantitative analysis of the lipidomes of the influenza virus  
25      envelope and MDCK cell apical membrane. *Journal of Cell Biology* 196(2):213-221.
- 26  11.   Leventis R & Silvius JR (2001) Use of cyclodextrins to monitor transbilayer movement  
27      and differential lipid affinities of cholesterol. *Biophysical Journal* 81(4):2257-2267.
- 28  12.   Quinn PJ (2013) Structure of Sphingomyelin Bilayers and Complexes with Cholesterol  
29      Forming Membrane Rafts. *Langmuir* 29(30):9447-9456.
- 30  13.   Jaikishan S & Slotte JP (2011) Effect of hydrophobic mismatch and interdigitation on  
31      sterol/sphingomyelin interaction in ternary bilayer membranes. *Biochimica Et Biophysica*  
32      *Acta-Biomembranes* 1808(7):1940-1945.

- 1 14. Turpin SM, *et al.* (2014) Obesity-induced CerS6-dependent C16:0 ceramide production  
2 promotes weight gain and glucose intolerance. *Cell Metabolism* 20(4):678-686.
- 3 15. Raichur S, *et al.* (2014) CerS2 Haploinsufficiency Inhibits beta-Oxidation and Confers  
4 Susceptibility to Diet-Induced Steatohepatitis and Insulin Resistance. *Cell Metabolism*  
5 20(4):687-695.
- 6 16. Guyomarc'H F, *et al.* (2014) Milk sphingomyelin domains in biomimetic membranes and  
7 the role of cholesterol: Morphology and nanomechanical properties investigated using  
8 AFM and force spectroscopy. *Langmuir* 30(22):6516-6524.
- 9 17. Chiantia S, Schwille P, Klymchenko AS, & London E (2011) Asymmetric GUVs  
10 prepared by M $\beta$ CD-mediated lipid exchange: An FCS study. *Biophysical Journal*  
11 100(1):L01-L03.
- 12 18. Cheng HT & London E (2011) Preparation and Properties of Asymmetric Large  
13 Unilamellar Vesicles: Interleaf let Coupling in Asymmetric Vesicles Is Dependent on  
14 Temperature but Not Curvature. *Biophysical Journal* 100(11):2671-2678.
- 15 19. Lin QQ & London E (2014) Preparation of Artificial Plasma Membrane Mimicking  
16 Vesicles with Lipid Asymmetry. *Plos One* 9(1):10.
- 17 20. Mayor S & Riezman H (2004) Sorting GPI-anchored proteins. *Nature Reviews Molecular*  
18 *Cell Biology* 5(2):110-120.
- 19 21. Raghupathy R, *et al.* (2015) Transbilayer lipid interactions mediate nanoclustering of  
20 lipid-anchored proteins. *Cell* 161(3):581-594.
- 21 22. Lingwood D & Simons K (2010) Lipid rafts as a membrane-organizing principle. *Science*  
22 327(5961):46-50.
- 23 23. Wadsworth JM, *et al.* (2013) The Chemical Basis of Serine Palmitoyltransferase  
24 Inhibition by Myriocin. *Journal of the American Chemical Society* 135(38):14276-14285.
- 25 24. Merrill AH, Vanechten G, Wang E, & Sandhoff K (1993) FUMONISIN-B(1) INHIBITS  
26 SPHINGOSINE (SPHINGANINE) N-ACYLTRANSFERASE AND DE-NOVO  
27 SPHINGOLIPID BIOSYNTHESIS IN CULTURED NEURONS IN-SITU. *Journal of*  
28 *Biological Chemistry* 268(36):27299-27306.
- 29 25. Zha XH, *et al.* (1998) Sphingomyelinase treatment induces ATP-independent  
30 endocytosis. *Journal of Cell Biology* 140(1):39-47.
- 31 26. Nagle JF & Tristram-Nagle S (2000) Structure of lipid bilayers. *Biochimica Et*  
32 *Biophysica Acta-Reviews on Biomembranes* 1469(3):159-195.
- 33 27. Brown DA & London E (1998) Structure and origin of ordered lipid domains in  
34 biological membranes. *Journal of Membrane Biology* 164(2):103-114.

- 1 28. Delmelle M, Wattiauxdeconinck S, Dubois F, & Wattiaux R (1980) IMIPRAMINE AND  
2 LIPID PHASE-TRANSITION IN INNER MITOCHONDRIAL-MEMBRANE.  
3 *Biochimica Et Biophysica Acta* 600(3):791-795.
- 4 29. Nakagawa Y, Nojima S, & Inoue K (1980) TRANSFER OF STEROIDS AND ALPHA-  
5 TOCOPHEROL BETWEEN LIPOSOMAL MEMBRANES. *Journal of Biochemistry*  
6 87(2):497-502.
- 7 30. Ohvo H & Slotte JP (1996) Cyclodextrin-mediated removal of sterols from monolayers:  
8 Effects of sterol structure and phospholipids on desorption rate. *Biochemistry*  
9 35(24):8018-8024.
- 10 31. Kahlenberg A, Walker C, & Rohrlack R (1974) Evidence for an asymmetric distribution  
11 of phospholipids in the human erythrocyte membrane. *Canadian Journal of Biochemistry*  
12 52(9):803-806.
- 13 32. Steck TL, Ye J, & Lange Y (2002) Probing red cell membrane cholesterol movement  
14 with cyclodextrin. *Biophysical Journal* 83(4):2118-2125.
- 15 33. Mondal M, Mesmin B, Mukherjee S, & Maxfield FR (2009) Sterols are mainly in the  
16 cytoplasmic leaflet of the plasma membrane and the endocytic recycling compartment in  
17 CHO cells. *Molecular Biology of the Cell* 20(2):581-588.
- 18 34. Schroeder F, *et al.* (1991) Transmembrane distribution of sterol in the human erythrocyte.  
19 *Biochimica et Biophysica Acta - Biomembranes* 1066(2):183-192.
- 20 35. Infante RE & Radhakrishnan A (2017) Continuous transport of a small fraction of plasma  
21 membrane cholesterol to endoplasmic reticulum regulates total cellular cholesterol. *Elife*  
22 6:23.
- 23 36. Liu SL, *et al.* (2017) Orthogonal lipid sensors identify transbilayer asymmetry of plasma  
24 membrane cholesterol. *Nature Chemical Biology* 13(3):268-+.
- 25 37. Maekawa M & Fairn GD (2015) Complementary probes reveal that phosphatidylserine is  
26 required for the proper transbilayer distribution of cholesterol. *Journal of Cell Science*  
27 128(7):1422-1433.
- 28 38. Giang H & Schick M (2014) How cholesterol could be drawn to the cytoplasmic leaf of  
29 the plasma membrane by phosphatidylethanolamine. *Biophysical Journal* 107(10):2337-  
30 2344.
- 31 39. Couttas TA, *et al.* (2016) Loss of ceramide synthase 2 activity, necessary for myelin  
32 biosynthesis, precedes tau pathology in the cortical pathogenesis of Alzheimer's disease.  
33 *Neurobiology of Aging* 43:89-100.
- 34 40. Fan S, *et al.* (2013) LASS2 enhances chemosensitivity of breast cancer by counteracting  
35 acidic tumor microenvironment through inhibiting activity of V-ATPase proton pump.  
36 *Oncogene* 32(13):1682-1690.

- 1 41. Juhasz J, Davis JH, & Sharom FJ (2010) Fluorescent probe partitioning in giant  
2 unilamellar vesicles of 'lipid raft' mixtures. *Biochemical Journal* 430(3):415-423.
- 3 42. Pronk S, *et al.* (2013) GROMACS 4.5: a high-throughput and highly parallel open source  
4 molecular simulation toolkit. *Bioinformatics (Oxford, England)* 29(7):845-854.
- 5 43. Berendsen HJC, Vandespoel D, & Vandrunen R (1995) Gromacs - a Message-Passing  
6 Parallel Molecular-Dynamics Implementation. *Comput Phys Commun* 91(1-3):43-56.
- 7 44. Bjelkmar P, Larsson P, Cuendet MA, Hess B, & Lindahl E (2010) Implementation of the  
8 CHARMM Force Field in GROMACS: Analysis of Protein Stability Effects from  
9 Correction Maps, Virtual Interaction Sites, and Water Models. *J Chem Theory Comput*  
10 6(2):459-466.
- 11 45. Klauda JB, *et al.* (2010) Update of the CHARMM all-atom additive force field for lipids:  
12 validation on six lipid types. *The journal of physical chemistry. B* 114(23):7830-7843.
- 13 46. Jorgensen WL, Chandrasekhar J, Madura JD, Impey RW, & Klein ML (1983)  
14 Comparison of Simple Potential Functions for Simulating Liquid Water. *J Chem Phys*  
15 79(2):926-935.
- 16 47. Nose S (1984) A Molecular-Dynamics Method for Simulations in the Canonical  
17 Ensemble. *Mol Phys* 52(2):255-268.
- 18 48. Hoover WG (1985) Canonical Dynamics - Equilibrium Phase-Space Distributions. *Phys*  
19 *Rev A* 31(3):1695-1697.
- 20 49. Hess B, Bekker H, Berendsen HJC, & Fraaije JGEM (1997) LINCS: A linear constraint  
21 solver for molecular simulations. *J Comput Chem* 18(12):1463-1472.
- 22 50. Parrinello M & Rahman A (1981) Polymorphic Transitions in Single-Crystals - a New  
23 Molecular-Dynamics Method. *J Appl Phys* 52(12):7182-7190.
- 24 51. Berendsen HJC, Postma JPM, Vangunsteren WF, Dinola A, & Haak JR (1984)  
25 Molecular-Dynamics with Coupling to an External Bath. *J Chem Phys* 81(8):3684-3690.
- 26 52. Bligh EG & Dyer WJ (1959) A rapid method of total lipid extraction and purification.  
27 *Canadian journal of biochemistry and physiology* 37(8):911-917.
- 28 53. Rizzo MA, Springer G, Segawa K, Zipfel WR, & Piston DW (2006) Optimization of  
29 pairings and detection conditions for measurement of FRET between cyan and yellow  
30 fluorescent proteins. *Microscopy and Microanalysis* 12(3):238-254.
- 31 54. Zal T & Gascoigne NRJ (2004) Photobleaching-corrected FRET efficiency imaging of  
32 live cells. *Biophysical Journal* 86(6):3923-3939.

33



## 1 **Figure Legends**

2 **Figure 1. Very long acyl chain SM abolishes optically resolvable microdomains when**  
3 **placed exclusively in the outer leaflet of GUVs.** **A)** In symmetric GUVs, cholesterol was  
4 necessary for the phase separation of saturated and unsaturated phospholipids, including GUVs  
5 with very long acyl chain SM (C24 SM) in both leaflets. Symmetric vesicles were visualized by  
6 incorporation of 0.05% rhodamine-DPPE and NBD-DPPE during electroformation. **B)**  
7 Pictogram of outer leaflet phospholipid exchange. Symmetric GUVs are converted to  
8 asymmetric GUVs by incubation with HP- $\alpha$ CD and excess donor lipid. After exchange of outer  
9 leaflet lipids, the acceptor GUVs are isolated from the donors and HP- $\alpha$ CD by filtration,  
10 resulting in asymmetric GUVs. **C) (a)** In asymmetric GUVs, introducing C24 SM in the outer  
11 leaflet of DPPC/DOPC/cholesterol vesicles suppressed visible microdomain formation. **(b)**  
12 Asymmetric vesicles with C16 SM in the outer leaflet formed microdomains. **(c)** Symmetric C24  
13 SM/DPPC/DOPC/cholesterol (scrambled) GUVs formed microdomains. **D)** Pure synthetic C16  
14 and C24 SM produced the same result as natural C16 (egg) and C24 (milk) SM. **E) (a)** Prior to  
15 incorporation of C24 SM, DPPC/DOPC/cholesterol GUVs display microdomains and lack NBD-  
16 DPPE. **(b)** Microdomains in DPPC/DOPC/cholesterol GUVs disappeared after incorporation of  
17 C24 SM and NBD-DPPE into the outer leaflet during outer leaflet exchange. **F)** Encapsulated  
18 symmetric DPPC/DOPC/cholesterol GUVs remained phase-separated inside asymmetric GUVs  
19 with exofacial C24 SM. Images were captured at 20 °C and were representative of a  
20 homogeneous population of 50-100 vesicles. Experiments were independently verified at least 3  
21 times. Asymmetric vesicles were visualized by initially labelling acceptor vesicles with 0.05%  
22 rhodamine-DPPE, followed by incorporation of NBD-DPPE during outer leaflet lipid exchange.  
23 Scale bar: 5 $\mu$ m.

24 **Figure 2. FRET efficiency increases with increasing molecular density of fluorescent**  
25 **proteins, which can monitor relative recruitment of GPI-APs into membrane domains.** **A)**  
26 Density-dependent FRET efficiency simulation: the solid points represent simulated density-  
27 dependent FRET predicted from density of YFP protein. Blue dots represent experimentally  
28 obtained FRET efficiencies from the cells treated with saponin. Notice that the stimulated line is  
29 linear within the range of the experimental YFP density. **B)** Pictogram of how the presence of  
30 membrane domains would affect density-dependent FRET between mCFP and mYFP GPI-APs.  
31 GPI-APs prefer L<sub>o</sub> (submicron domains), which increases the fluorescent protein density within  
32 the submicron domains and enhances the FRET.

33 **Figure 3. Outer leaflet C24 sphingomyelin suppresses membrane submicron domains in the**  
34 **live cell plasma membrane.** **A)** Quantification of sphingolipid acyl chain lengths determined by  
35 thin layer chromatography (TLC). Quantities of sphingolipids were determined relative to total  
36 cell phospholipid levels by densitometry. Untreated cells (DMSO) were compared to  
37 sphingolipid deletion by myriocin and fumonisins b1 (M+F) and subsequent supplementation  
38 with C16 or C24 SM. **B)** The effect of cholesterol depletion by saponin on FRET between mCFP  
39 and mYFP GPI-anchored proteins in live HeLa cells from sphingolipid depletion and subsequent



1 supplementation with C16 or C24 SM. C) FRET efficiency, E (%), between mCFP and mYFP  
2 GPI-anchored proteins in live HeLa cells with sphingolipid depletion and subsequent  
3 supplementation with C16 or C24 SM.

4 **Figure 4. Cholesterol displays a preference for the inner bilayer leaflet when very long acyl**  
5 **chain sphingomyelin is in the outer leaflet. A) (a)** Free energy profile of transferring a  
6 cholesterol molecule from outer leaflet to the inner leaflet in a C24 SM asymmetric membrane  
7 shows cholesterol prefers the inner leaflet. The Z-axis refers to the z-distance between the  
8 position of the pulled cholesterol molecule relative to the center of the bilayer,  $Z=0$  (see  
9 Methods). Errors in the free energy profile were determined using the bootstrap analysis method.  
10 **(b)** Normalized density profile for specific atoms of C24 SM in the C24 SM membrane system.  
11 Only the head group phosphate (green) and terminal acyl chain carbons (blue and red) are  
12 displayed to demonstrate the depth of acyl chain penetration into the bilayer. **B) (a)** Free energy  
13 profile for transferring a cholesterol molecule from outer leaflet to the inner leaflet in a C16 SM  
14 asymmetric membrane shows cholesterol has a slight preference for the outer leaflet. The Z-axis  
15 and errors are the same as in A. **(b)** Normalized density profile for specific atoms of C16 SM in  
16 the C16 SM membrane system. Only the head group phosphate (green) and terminal acyl chain  
17 carbons (blue and red) are displayed to demonstrate the depth of acyl chain penetration into the  
18 bilayer.

19 **Figure 5. Cholesterol flip-flop is prevented at 0 °C and evenly partitioned between the**  
20 **inner and outer leaflet of symmetric LUVs. A)** Pictogram of cholesterol extraction from a  
21 symmetric membrane bilayer by MCD at 0 °C and 37 °C. Membranes are labelled with trace of  
22 <sup>3</sup>H-cholesterol and allowed to equilibrate. Lowering temperature to 0 °C prevents cholesterol  
23 flip-flop, which facilitates selective outer leaflet cholesterol extraction and quantification by  
24 MCD. At 37 °C, cholesterol flip-flop is active and MCD can extract 100 % of the cholesterol due  
25 to inner leaflet cholesterol flipping outward. **B)** In symmetric POPC/POPS/POPE (1:1:1) LUVs,  
26 MCD was able to extract 100% cholesterol at 37°C but at 0 °C, only 50% cholesterol is  
27 removable, verifying that cholesterol flip-flop is prevented. **C)** Cholesterol extraction from  
28 symmetric C16 SM LUVs at 0 °C showed cholesterol is evenly partitioned between inner and  
29 outer leaflets. **D)** Cholesterol extraction from symmetric C18 SM LUVs 0 °C showed cholesterol  
30 is evenly partitioned between inner and outer leaflets. **E)** Cholesterol extraction from symmetric  
31 C24 SM LUVs 0 °C showed cholesterol is evenly partitioned between inner and outer leaflets. **F)**  
32 Cholesterol extraction from symmetric POPC/POPS/POPE (1:1:1) LUVs -5 °C showed  
33 cholesterol is evenly partitioned between inner and outer leaflets.

34 **Figure 6. Outer leaflet very long acyl chain sphingomyelin concentrates cholesterol into the**  
35 **inner leaflet.** Asymmetric LUVs were generated by outer leaflet lipid exchange and cholesterol  
36 was extracted by 5 mM MCD at 0 °C. **A)** In asymmetric LUVs with PC/PE/PS in the inner  
37 leaflet, outer leaflet C24 SM shifted cholesterol to the inner leaflet. Abolishing asymmetry by  
38 scrambling the asymmetric C24 SM LUVs into symmetric LUVs with an identical composition  
39 recovered 50/50 cholesterol partitioning (inset). **B)** Cholesterol extraction from asymmetric C16

1 SM LUVs at 0 °C shows cholesterol is evenly partitioned between bilayer leaflets. **C)**  
2 Cholesterol extraction from asymmetric C18 SM LUVs at 0 °C shows cholesterol is evenly  
3 partitioned between bilayer leaflets. **D)** Cholesterol extraction from asymmetric POPC LUVs at  
4 0 °C shows cholesterol is evenly partitioned between bilayer leaflets. **E)** Cholesterol extraction at  
5 0 °C from asymmetric C24 SM LUVs with PC/PE/PS, PC/PE or PC/PS in the inner leaflet shows  
6 C24 SM continues to alter the cholesterol partitioning. **F)** Cholesterol extraction at 0 °C from  
7 asymmetric LUVs with both C16 and C24 SM in the outer leaflet. Outer leaflet C16/C24 SM  
8 (50:50) continues to alter the cholesterol partitioning. Error bars represent standard error of the  
9 mean from at least 3 independent experiments.

10 **Figure 7. Outer leaflet very long acyl chain sphingomyelin concentrates cholesterol into the**  
11 **inner leaflet of cholesterol-rich LUVs and cholesterol is primarily located in the**  
12 **cytoplasmic leaflet of human erythrocytes. A)** Pictogram of intermembrane cholesterol  
13 exchange facilitated by  $\beta$ CD as shuttle, between donor and acceptor membranes with 30 %  
14 cholesterol.  $^3\text{H}$ -cholesterol is transferred from the donor membrane to acceptor membrane (100-  
15 fold excess) by  $\beta$ CD and replaced with unlabelled cholesterol. During exchange, the accessible  
16  $^3\text{H}$ -cholesterol is depleted from the donors, while the total cholesterol content in the donor and  
17 acceptor membranes remains unchanged. After exchange, the donor and acceptor populations are  
18 separated by brief centrifugation and quantified. **B)** In symmetric POPE/POPS/POPC (1:1:1)  
19 LUVs containing 30% cholesterol, cholesterol was evenly distributed between leaflet, as 50%  
20 and 100%  $^3\text{H}$ -cholesterol was exchangeable at 0 and 37 °C, respectively. **C)** In 30 % cholesterol  
21 LUVs with C24 SM exclusively into the outer leaflet of POPE/POPS/POPC (1:1:1) LUVs, only  
22 20%  $^3\text{H}$  cholesterol was exchangeable at 0 °C and 100% at 37 °C. **D)** In  $^3\text{H}$ -cholesterol labelled  
23 human erythrocytes, also only 20%  $^3\text{H}$  cholesterol was exchangeable with at 0 °C with 100 fold  
24 unlabelled erythrocytes, demonstrating that cholesterol is primarily in the cytoplasmic leaflet.  
25 Error bars represent standard error of the mean from at least 3 independent experiments.

26

1  
2 **Main Figures**  
3 **Figure 1**

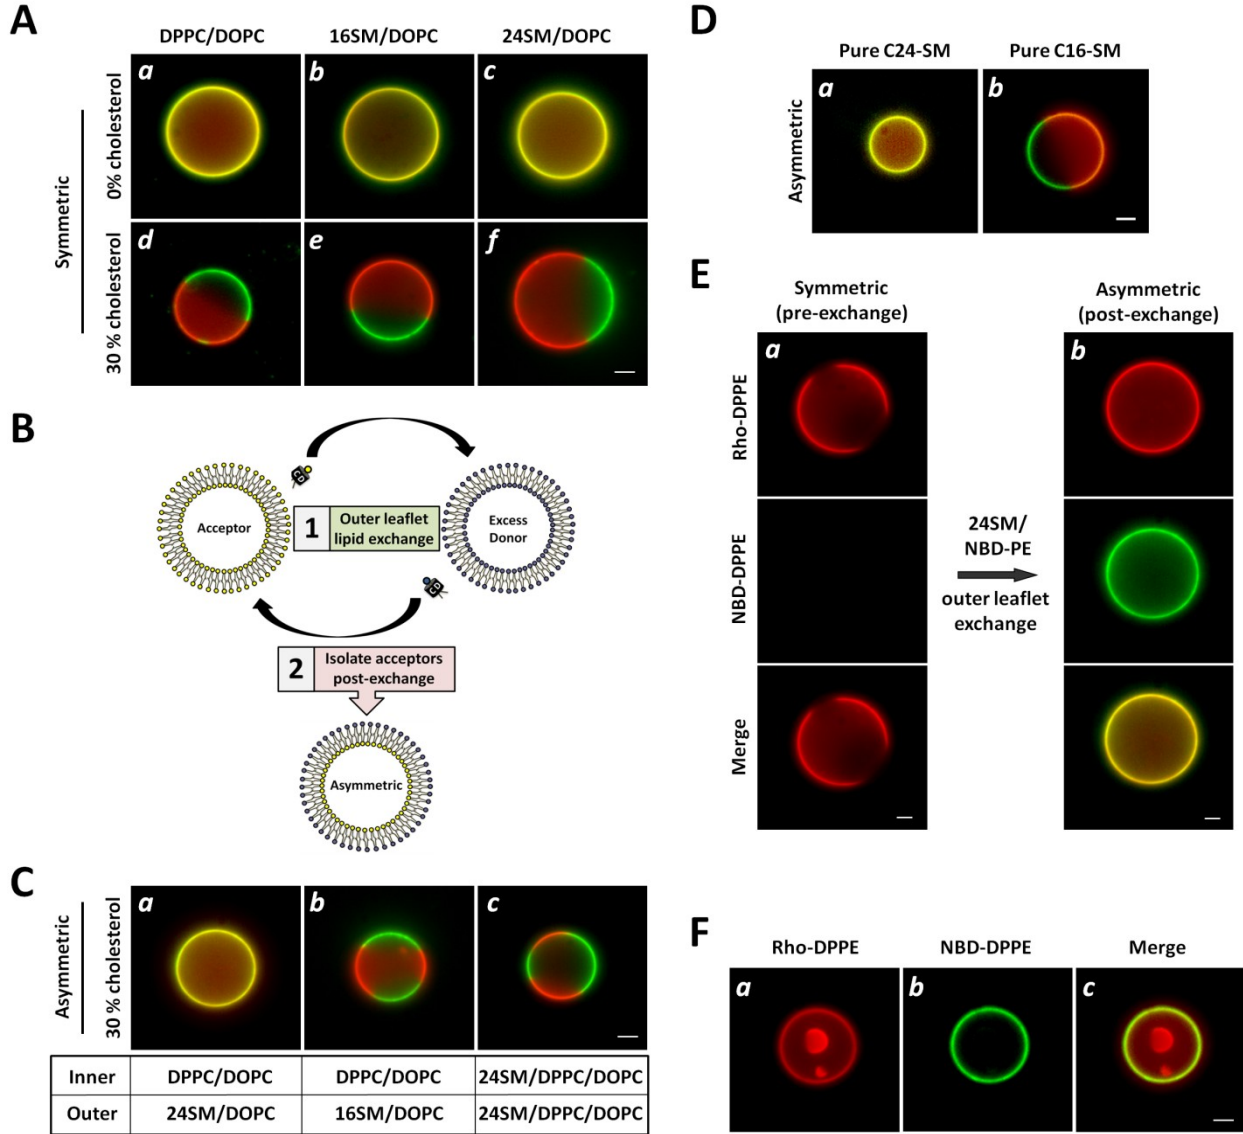

4  
5

1  
2 **Figure 2**

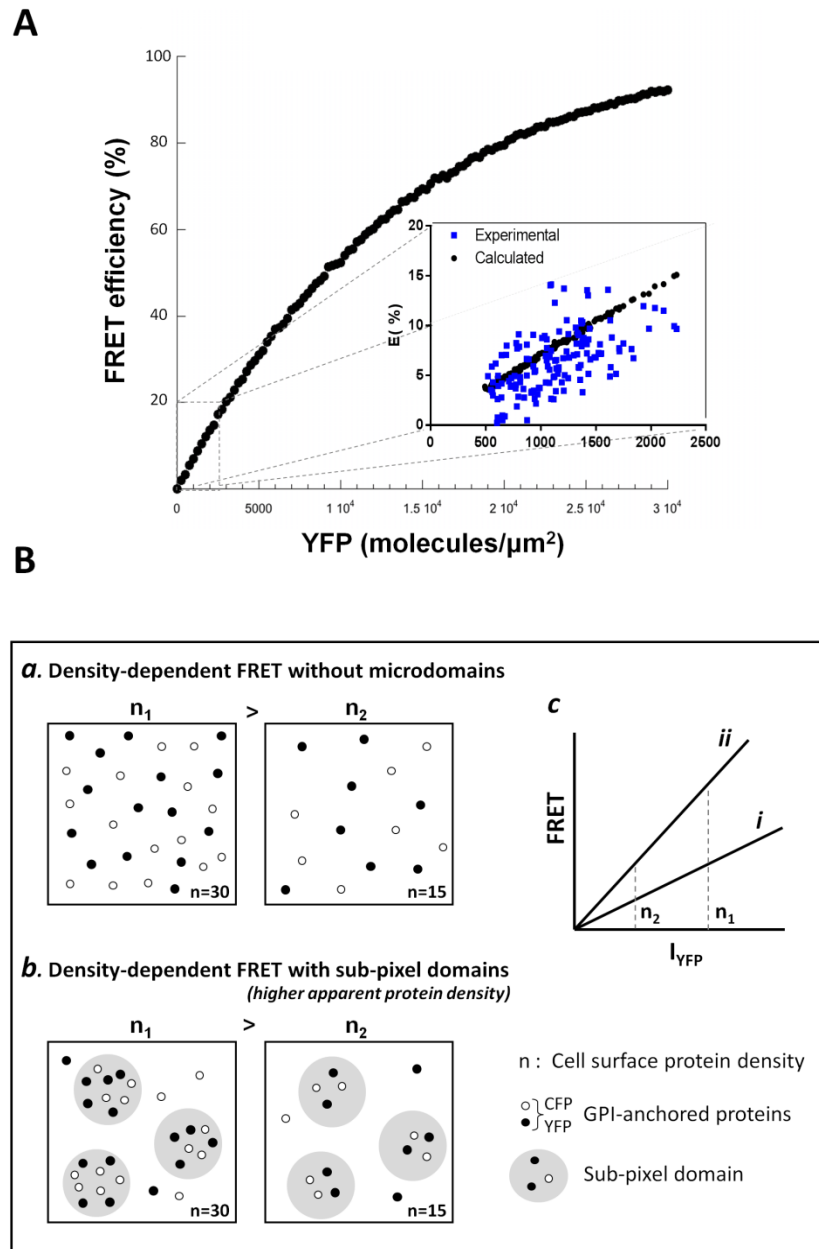

3

4

1  
2 **Figure 3**

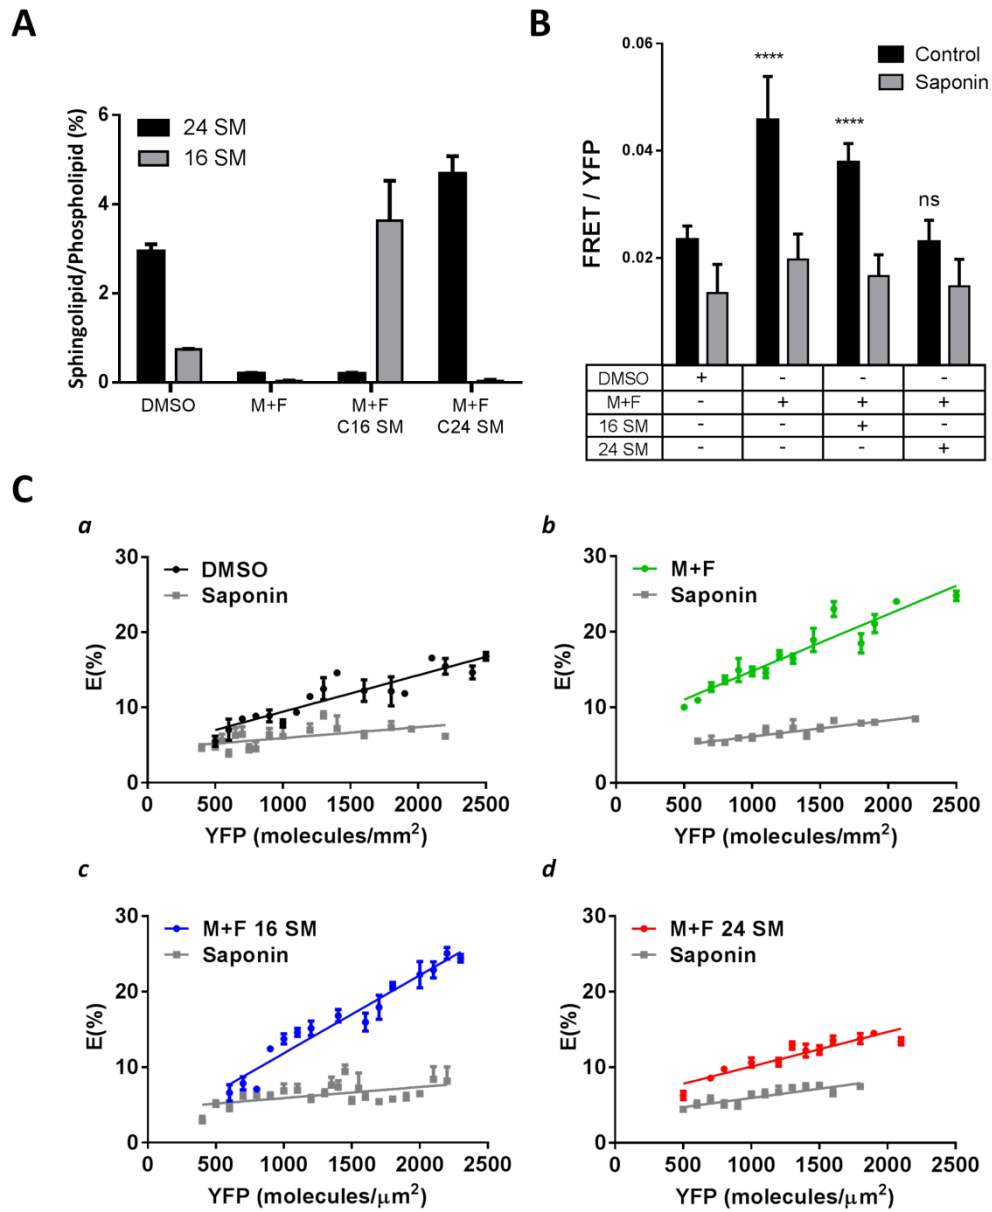

3

4

1

2 **Figure 4**

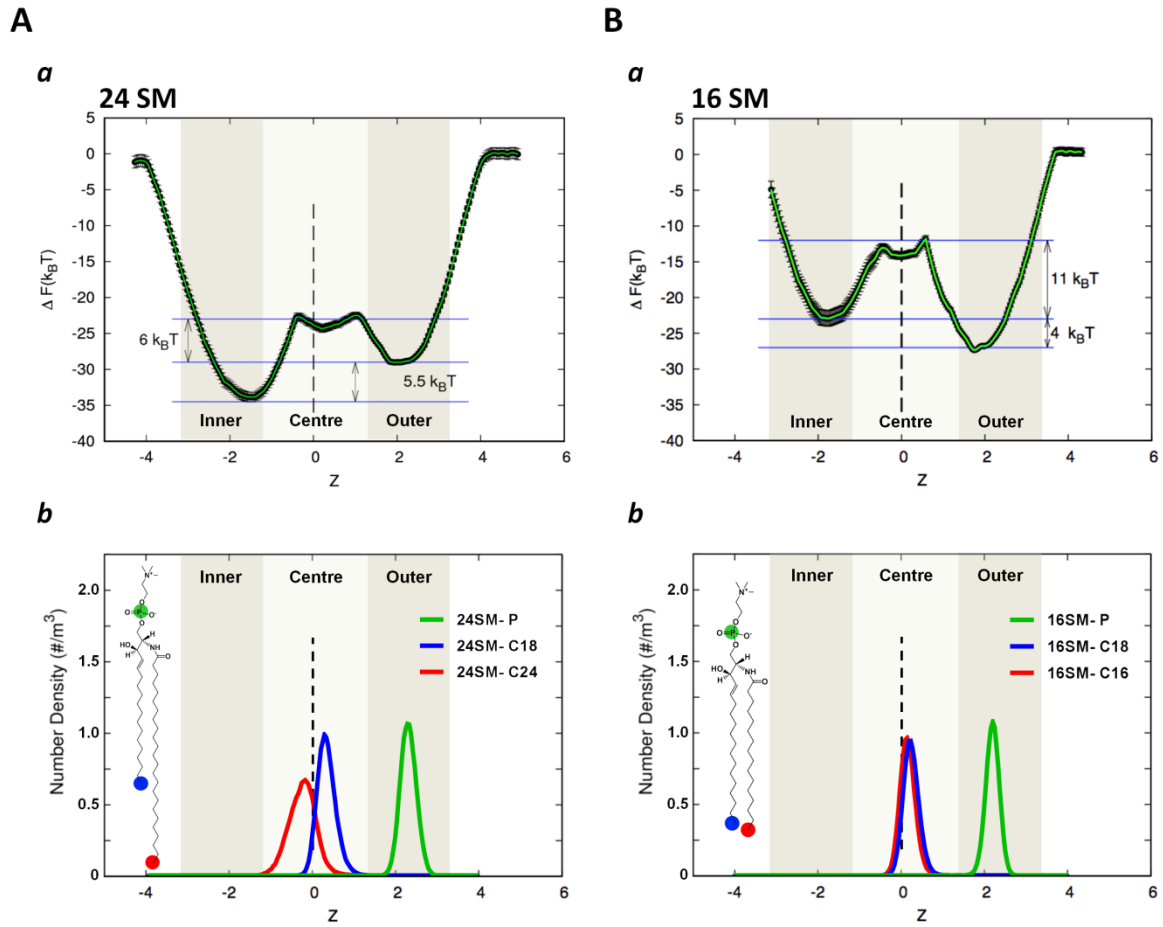

3

4

1

2 **Figure 5**

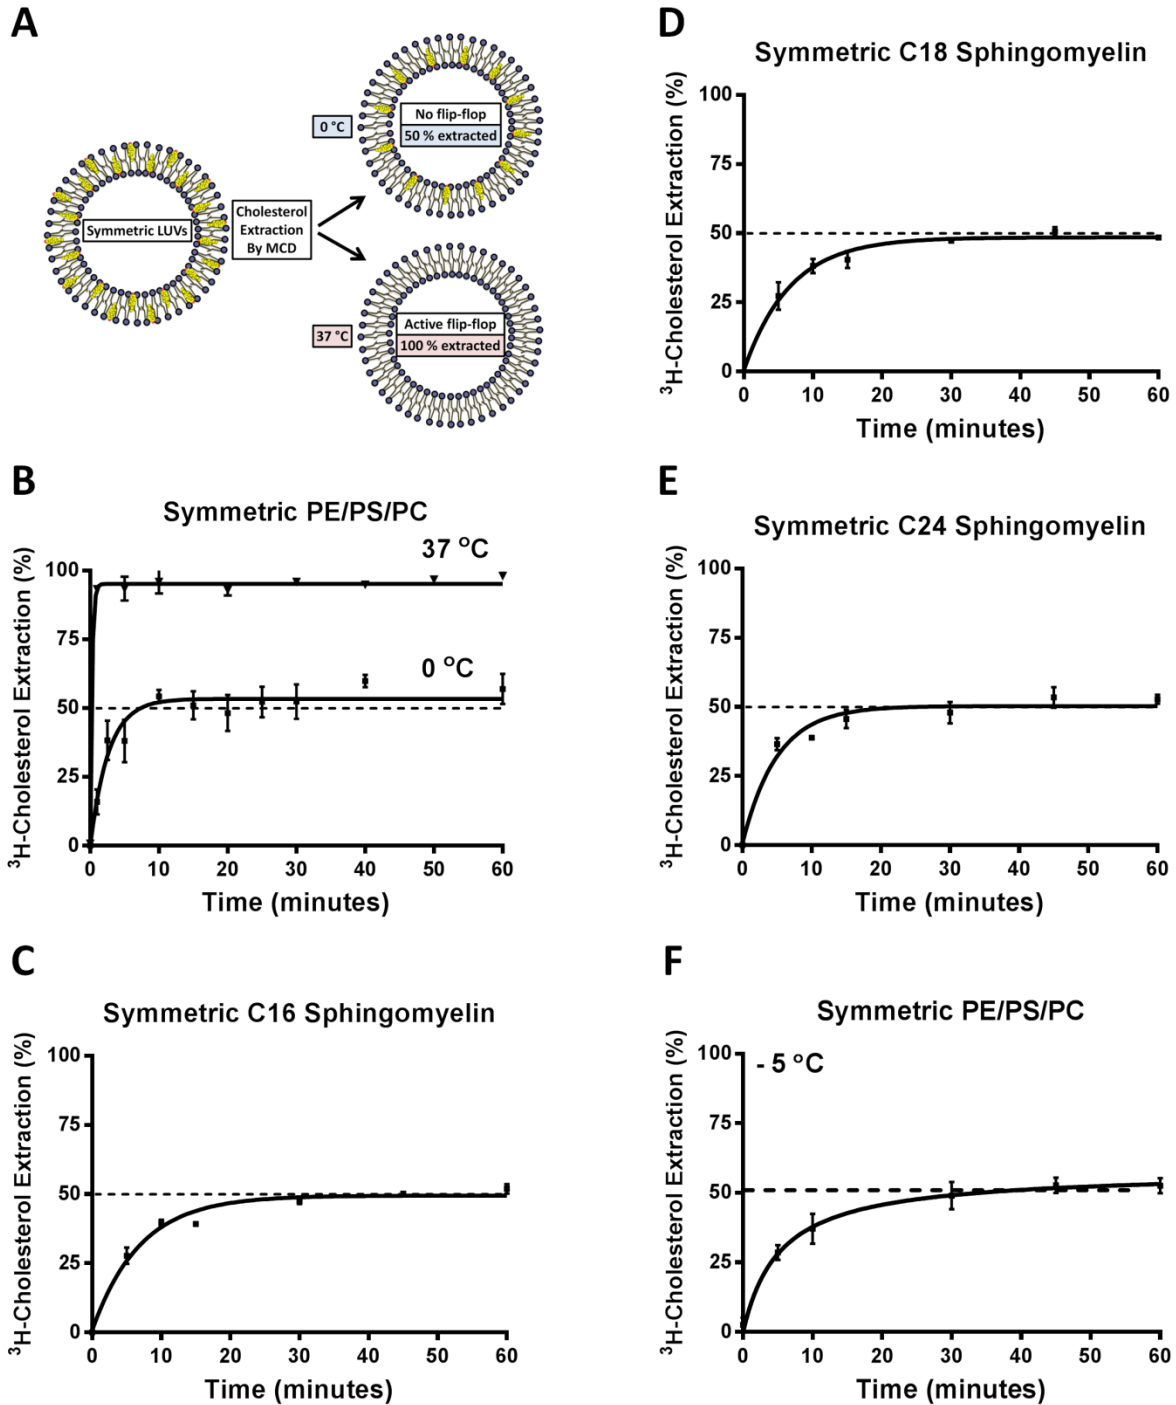

3

4

1

2 **Figure 6**

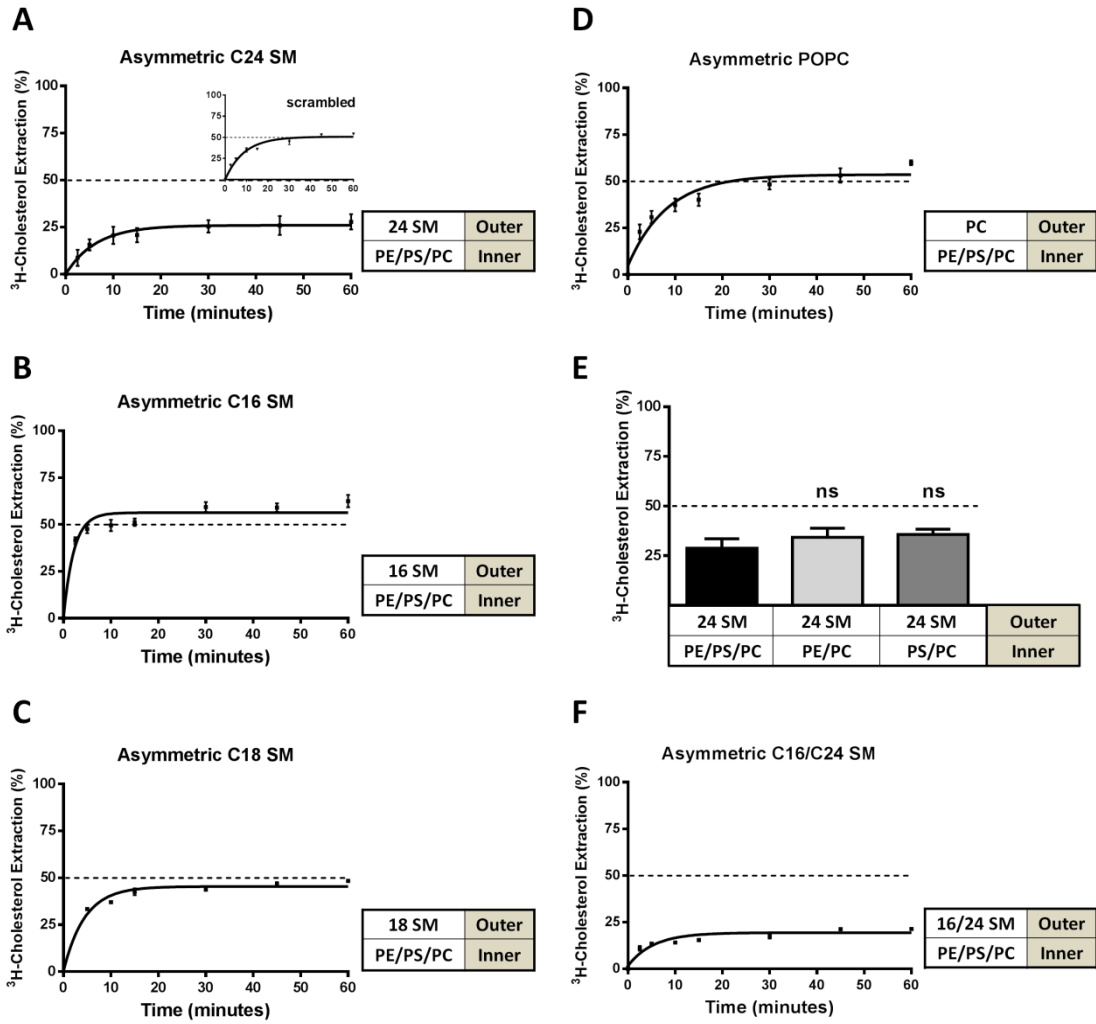

3

4



1

2 **Figure 7**

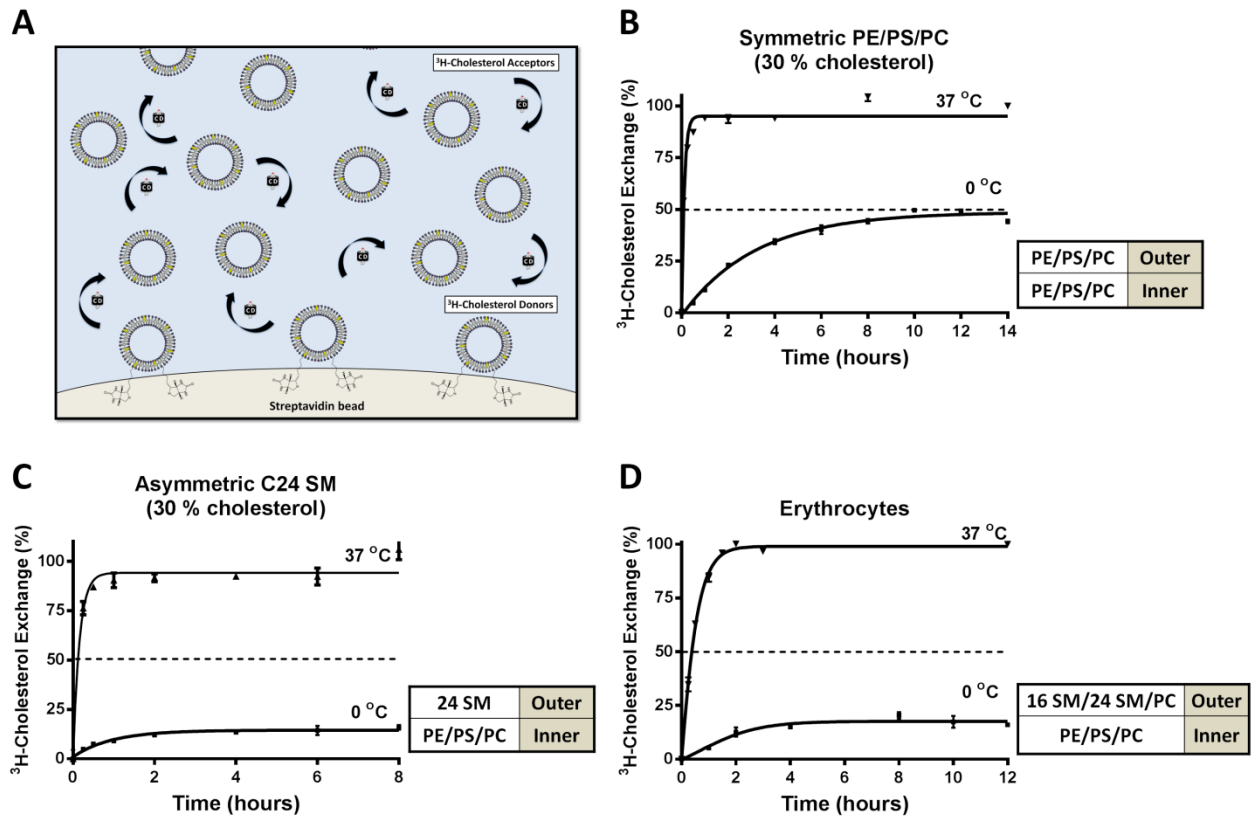

3

4

1

## 2 **Supporting Information**

### 3 **Supplementary Figure Legends**

4 **Supplementary Fig. 1. Cholesterol is essential for phase separation in GUVs.** Introduction of  
5 30 % cholesterol into GUVs containing saturated DPPC and unsaturated DOPC (1:1)  
6 phospholipids causes lipid immiscibility. NBD-DPPE (green) and Rho-DPPE (red) segregate to  
7 the liquid ordered ( $L_o$ ) and liquid disordered ( $L_d$ ) regions, respectively. Scale bar represents 5 $\mu$ m.

8 **Supplementary Fig. 2. Very long acyl chain sphingolipids in the outer leaflet prevent phase**  
9 **separation in asymmetric vesicles regardless of temperature and cholesterol concentration.**  
10 **A)** Introduction of C24 SM into the outer leaflet of DOPC/DPPC/cholesterol GUVs prevents  
11 microdomain formation in a wide range of temperatures. **B)** Symmetric C24 SM GUVs form  
12 membrane domains when the cholesterol concentration is less than 40%. Asymmetric C24 SM  
13 GUVs prevent microdomain formation at all cholesterol concentrations. Vesicles were visualized  
14 by incorporation of 0.05% rhodamine-DPPE.

15 **Supplementary Fig. 3. Thin layer chromatography of whole cell lipids after depletion of**  
16 **sphingolipids and subsequent supplementation with C16 or C24 sphingomyelin.** HeLa cells  
17 were treated with DMSO or myriocin and fumonisins b1 (50  $\mu$ M) for 3 days. To incorporate the  
18 desired sphingolipids, the cells were incubated with a sphingomyelin/ $\gamma$ -cyclodextrin complex  
19 containing 10  $\mu$ M sphingomyelin for 1 hour at 37 °C. The cells were then either characterized by  
20 microscopy, or the whole cell lipids were extracted, purified and run on a thin layer  
21 chromatography plate. Lipids on the plate were visualized with coomassie blue G stain.

22 **Supplementary Fig. 4. Supplementing HeLa cells with C16 or C24 sphingomyelin restores**  
23 **sensitivity to sphingomyelinase after endogenous sphingolipids have been depleted.** **A)**  
24 Fluorescence microscopy of FITC-dextran endocytosis in HeLa cells. HeLa cells were treated  
25 with either DMSO or Fumonisin B1 and Myriocin for 72 hours. Post drug treatment, C 16 SM  
26 or 24 SM complexed to  $\gamma$ -cyclodextrin was added back to the cells for 1 hour. The cells were  
27 then washed and incubated in medium containing 5 mg/ml FITC-dextran plus 50 mU/ml  
28 sphingomyelinase for 10 min. Cells were fixed and examined by fluorescence microscopy as  
29 described in Materials and Methods. **B)** Quantification of endocytosed FITC dextran intensity,  
30 relative to the DMSO control. Error bars represent standard error of the mean for three  
31 independent experiments.

32 **Supplementary Fig. 5. Glycosylphosphatidylinositol anchored proteins (GPI-APs) localize**  
33 **to the plasma membrane in HeLa cells.** CFP and YFP GPI-APs were expressed in HeLa cells  
34 and visualized by fluorescence microscopy.

35 **Supplementary Fig. 6. Snapshot of molecular dynamic simulations of asymmetric bilayers**  
36 **with 16:0 and 24:0 SM in the outer leaflet.** **A)** Cross sectional image of asymmetric 24:0 SM

1 membrane at the end of the simulation. **B)** Cross sectional image of asymmetric 16:0 SM  
2 membrane at the end of the simulation. Lipid composition for both 16:0 and 24:0 SM  
3 simulations: 20 SM (blue), 20 DPPC (yellow), 20 DOPC (cyan) and 24 CHL (black) molecules  
4 in the upper monolayer and 28 DPPC, 29 DOPC and 24 CHL in the lower monolayer. 5158  
5 water molecules are present. Red and gray spheres are O and P atom of cholesterol and DOPC  
6 lipids respectively.

7 **Supplementary Fig. 7. Cholesterol displays an energetic preference for the inner bilayer**  
8 **leaflet when very long acyl chain sphingomyelin is in the outer leaflet.** The atomic density of  
9 all the lipid species is represented. **A)** *(a)* Free energy profile of transferring a cholesterol  
10 molecule from outer leaflet to the inner leaflet in a C24 SM asymmetric membrane shows  
11 cholesterol prefers the inner leaflet. The Z-axis refers to the z-distance between the positions of  
12 cholesterol relative to the bilayer centre (see Methods). *(b)* Normalized density profile for  
13 specific atoms of different lipids in the C24 SM membrane system. The Z-axis refers to the  
14 proximity of the lipids relative to the bilayer centre. 24SM-P, DOPC-P, DPPC-P and cholesterol-  
15 O3 depict the average location of the phosphate or oxygen atom of the lipid head groups. 24SM-  
16 C18, 24SM-C24, DPPC-C16 and DOPC-C18 depict the location of the lipid acyl chains. The  
17 locations of only the terminal acyl chain carbons are displayed to demonstrate the depth of acyl  
18 chain penetration into the bilayer. **B)** *(a)* Free energy profile for transferring a cholesterol  
19 molecule from outer leaflet to the inner leaflet in a C16 SM asymmetric membrane shows  
20 cholesterol has a slight preference for the outer leaflet. The Z-axis refers to the proximity of the  
21 lipids relative to the bilayer centre (see Methods). *(b)* Normalized density profile for specific  
22 atoms of different lipids in the 16:0 SM membrane system. The Z-axis refers to the proximity of  
23 the lipids relative to the bilayer centre. 16SM-P, DOPC-P, DPPC-P and cholesterol-O3 depict the  
24 average location of the phosphate or oxygen atom of the lipid head groups. 16SM-C18, 16SM-  
25 C16, DPPC-C16 and DOPC-C18 depict the location of the lipid acyl chains. The locations of  
26 only the terminal acyl chain carbons are displayed to demonstrate the depth of penetration into  
27 the bilayer.

28 **Supplementary Fig. 8. Free energy of cholesterol movement across the bilayer is unaffected**  
29 **by the directionality of the Potential of Mean Force (PMF) calculation.** Free energy profiles  
30 for the asymmetric C24 SM systems when cholesterol was pulled from the outer to inner (red)  
31 and inner to outer (blue) monolayers. The same trend (cholesterol favouring the inner leaflet) is  
32 observed, regardless of PMF directionality. The error bars are not shown to clearly distinguish  
33 between the two free energy profiles.

34 **Supplementary Fig. 9. Cholesterol exhibits reduced hydrogen bonding strength with C24**  
35 **sphingolipids compared to C16 sphingolipids in asymmetric membrane molecular dynamic**  
36 **simulations.** Each plot is a distribution of the H-bond distances formed between specific species:  
37 **A)** Cholesterol and all upper leaflet lipids. **B)** Cholesterol and upper leaflet DOPC. **C)**  
38 Cholesterol and upper leaflet DPPC. **D)** Cholesterol and upper leaflet SM. **E)** Cholesterol and all  
39 lower leaflet lipids. **F)** Cholesterol and lower leaflet DOPC. **G)** Cholesterol and lower leaflet

1 DPPC. The  $\langle n \rangle$  value in the upper right corner of each panel refers to the number of H-bonds  
2 made by cholesterol in each plot. The data (A and D) shows that the H-bonding with 16 SM  
3 occurs at shorter distances (corresponding to a stronger H-bond) than with 24 SM. All other  
4 distributions are identical. **H)** Comparison of Lennard-Jones (LJ) and electrostatic interaction  
5 energies between C16 or C24 SM and the solvent molecules.

6 **Supplementary Fig. 10. Vesicles are unilamellar and remain intact after cholesterol**  
7 **extraction with cyclodextrin.** **A)** Symmetric LUVs containing phosphatidylethanolamine (PE)  
8 were incubated with membrane impermeable trinitrobenzylsolphate (TNBS). Only outer leaflet  
9 PE will react with TNBS. The amount of reactive PE in intact vesicles was determined by  
10 reading absorbance at 410nm compared with TNBS reactive PE from TX-100 solubilized LUVs  
11 (100%). TNBS modified 50% PE of LUVs, demonstrating that PE is equally distributed between  
12 leaflets and that the LUVs are unilamellar. **B)** LUVs with encapsulated Cy3 were treated with  
13 PBS, MCD (5 mM) or dissolved with 1% TX-100. The amount of Cy3 released into the media  
14 after 30 minute treatment was quantified by fluorescence spectroscopy. MCD treatment did not  
15 cause Cy3 leakage and thus did not affect LUV structural integrity.

16 **Supplementary Fig. 11. Characterization of transversely asymmetric large unilamellar**  
17 **vesicles.** **A)** Representative phospholipid composition in acceptor PE/PS/PC LUVs before and  
18 after outer leaflet exchange with milk SM LUVs by mass spectrometry analysis. **B)** LUVs were  
19 made with 1% TMA-DPH. SM/cholesterol LUVs (black bar) had higher anisotropy value than  
20 PC/PS/PE/cholesterol LUVs (white bar). Asymmetric vesicles were then generated from these  
21 PC/PS/PE/cholesterol LUVs by changing with C24 SM/cholesterol LUVs that contain no TMA-  
22 DPH. Resulting asymmetric LUVs maintained the acceptor's anisotropy, as TMA-DPH  
23 remained in the inner leaflet after the outer leaflet exchange with SM (asymmetric, light gray  
24 bar). However, if the same LUVs were dissolved and remade into symmetric LUVs (scrambled,  
25 dark gray bar), anisotropy took an intermediate value between donor and acceptor. TMA-DPH  
26 now senses the effect of SM in the LUVs, indicating the successful introduction of SM into the  
27 outer leaflet of the acceptor LUVs.

28 **Supplementary Fig. 12. C24 sphingolipids are abundant in many cell types.** **A)** Total lipids  
29 were extracted from multiple mammalian cell types and resolved by thin layer chromatography  
30 (TLC) using a chloroform/acetone/methanol/acetic acid/water (6:8:2:2:1) solvent system. Lipids  
31 on the plate were visualized with coomassie blue G stain. **B)** Densitometric quantification of  
32 TLC sphingolipid content, relative to total lipid staining.

33 **Supplementary Fig. 13. Human erythrocytes contain predominantly C24 acyl chain**  
34 **sphingolipid and erythrocytes remain intact during cholesterol exchange protocol.** **A)**  
35 Representative thin layer chromatography showing the relative quantities of lipids isolated from  
36 human erythrocytes. Lane 1, lipid standards. Lanes 2-6 show increasing quantities (E1-60  $\mu$ L,  
37 E2-90  $\mu$ L, E3-130  $\mu$ L, E4-170  $\mu$ L, E5-200  $\mu$ L) of lipids isolated from human erythrocytes. **B)**  
38 Quantification of the relative abundance of C16 and C24 sphingolipids isolated from human  
39 erythrocytes. **C)** Quantification of erythrocyte number after exchange protocol with medium

- 1 along or plus 1mM  $\beta$ CD. Error bars represent standard error of the mean from 3 independent
- 2 experiments.
- 3

1 **Supplementary Figure 1**

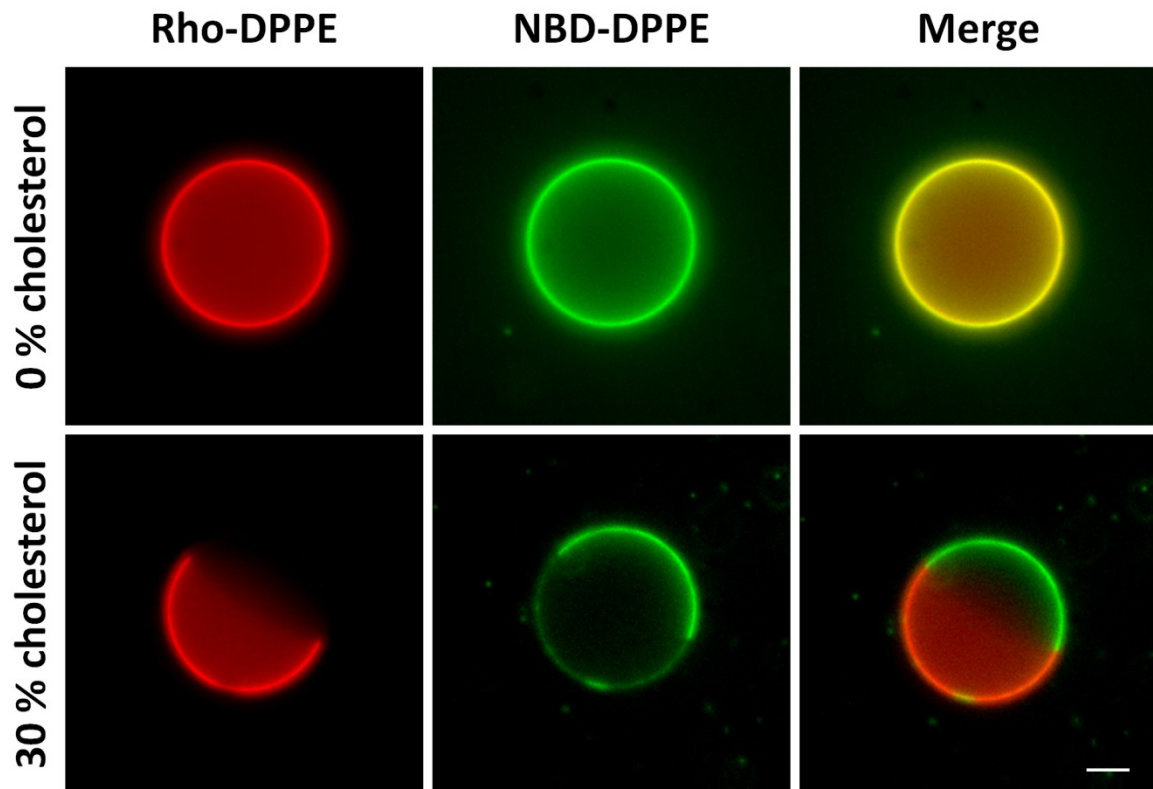

2

3

1

2 **Supplementary Figure 2**

**A**

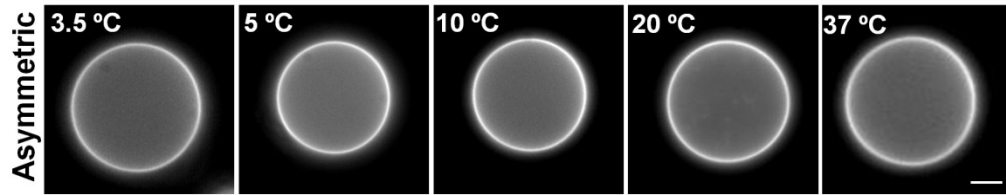

**B**

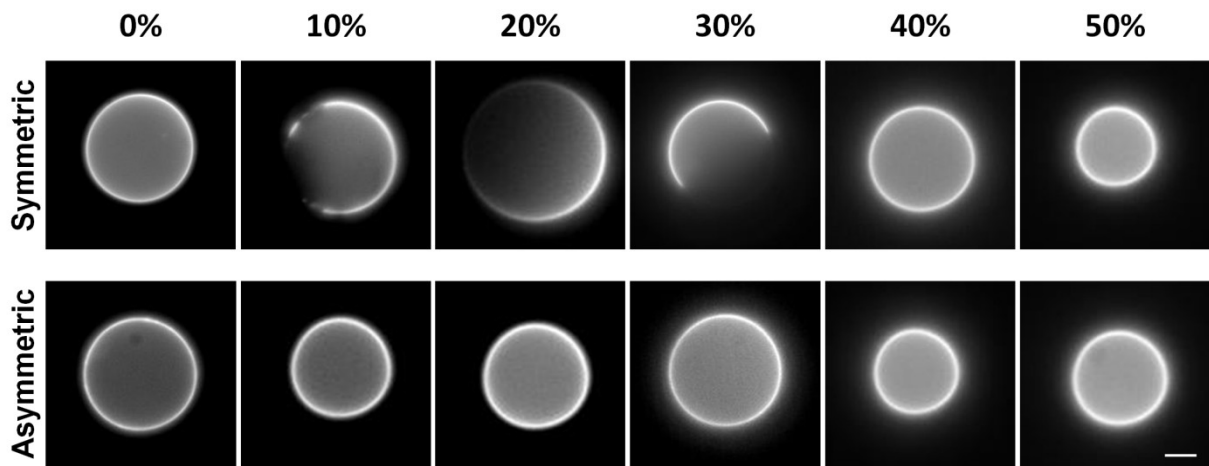

3

4

1

2 **Supplementary Figure 3**

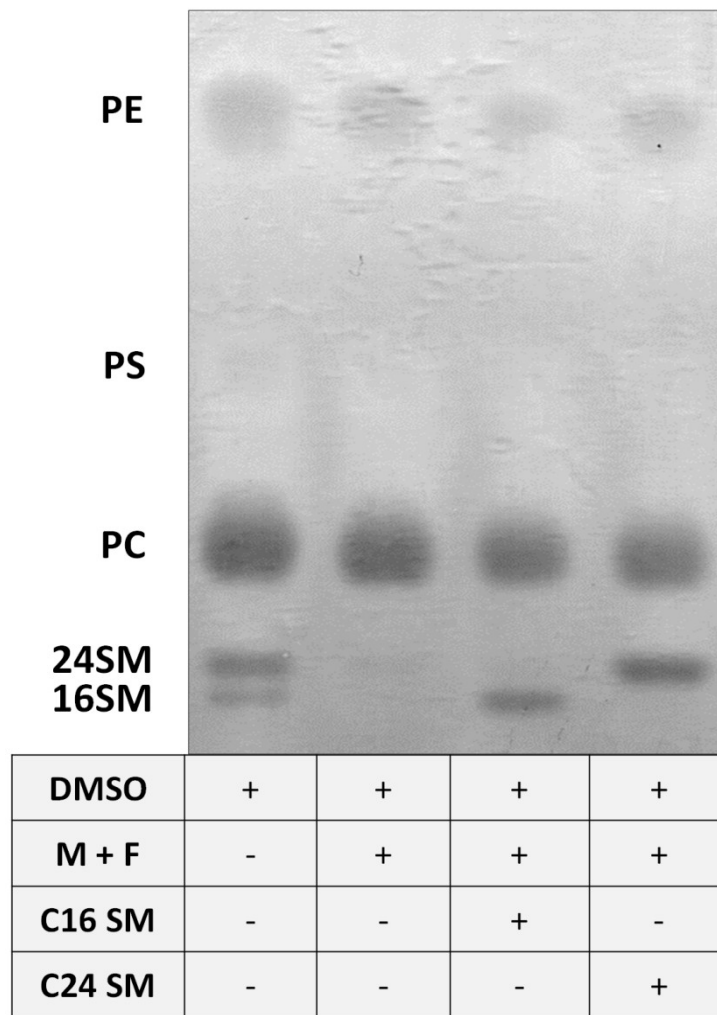

3

4



1

2 **Supplementary Figure 4**

**A**

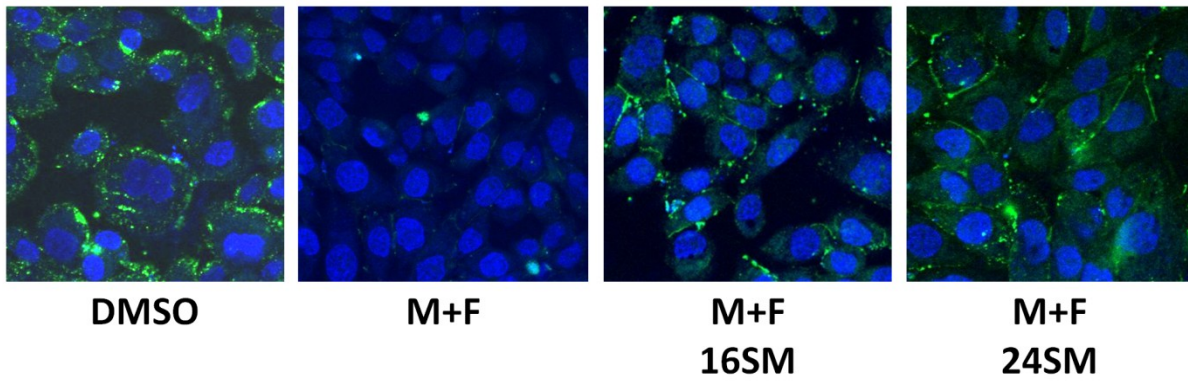

**B**

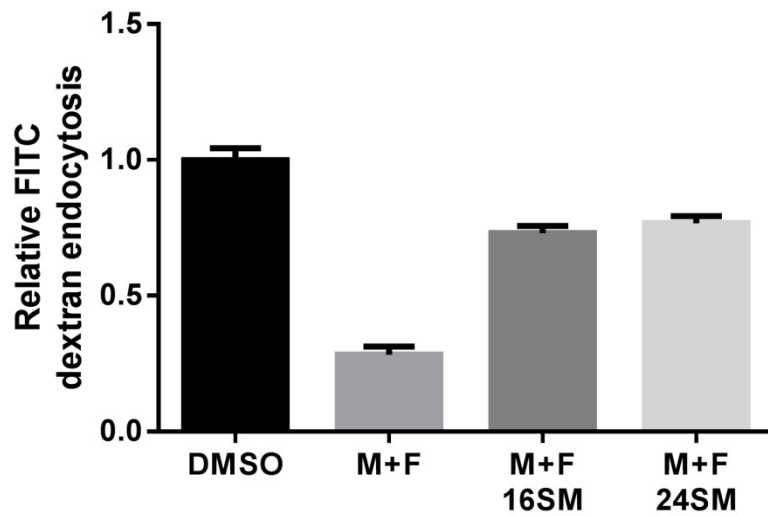

3

4

1

2 **Supplementary Figure 5**

**CFP-GPI-AP**

**YFP-GPI-AP**

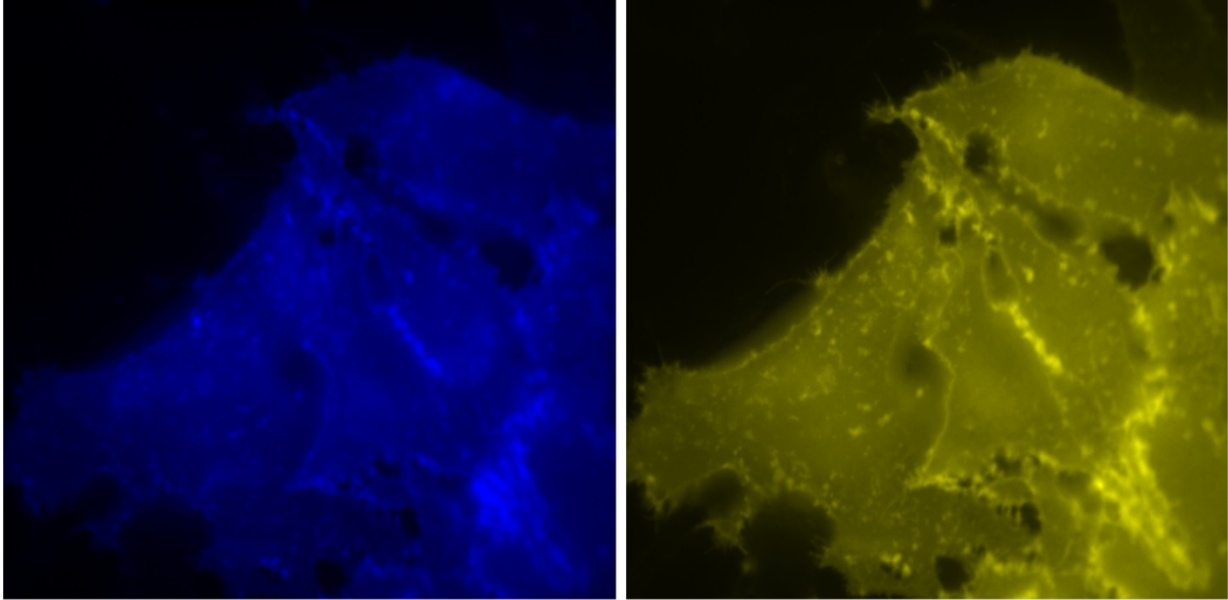

3

4

1

2 **Supplementary Figure 6**

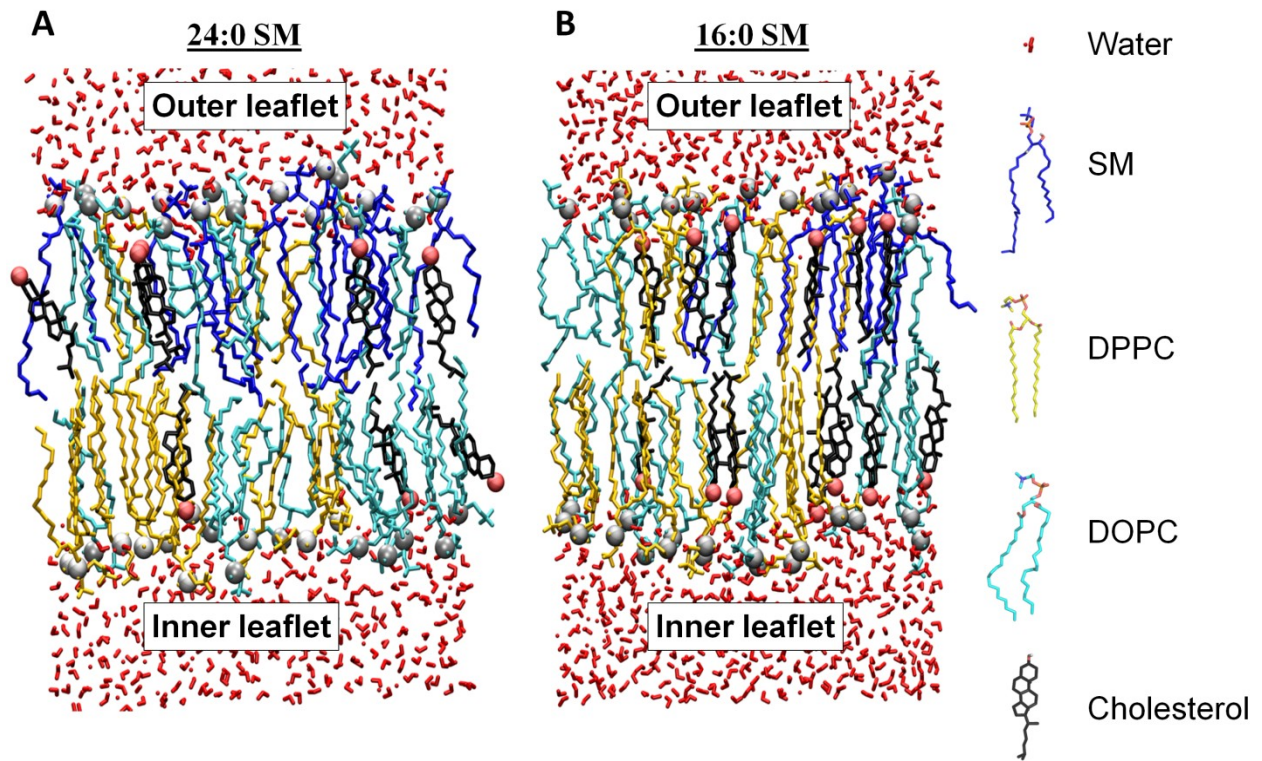

3

4

1

2 **Supplementary Figure 7**

**A**

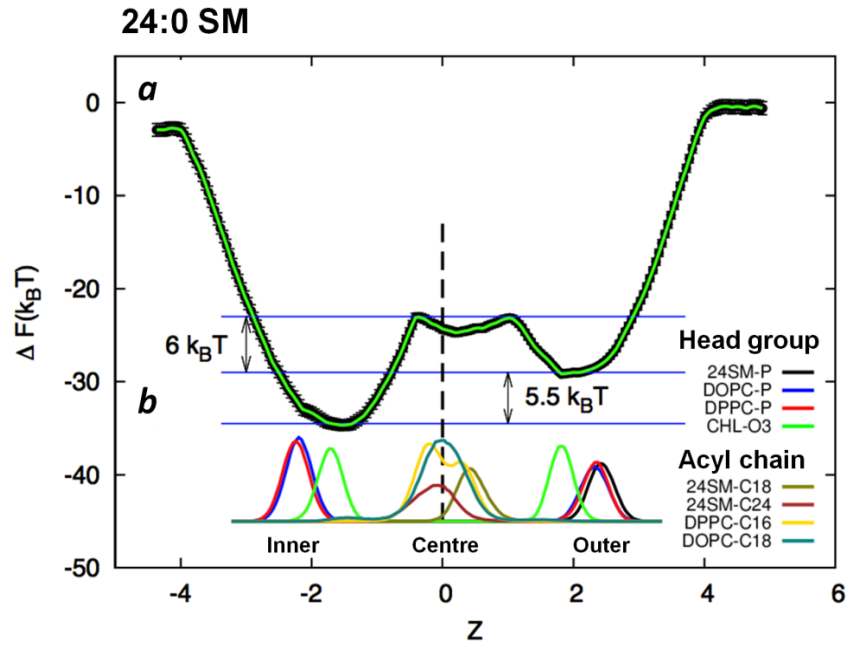

**B**

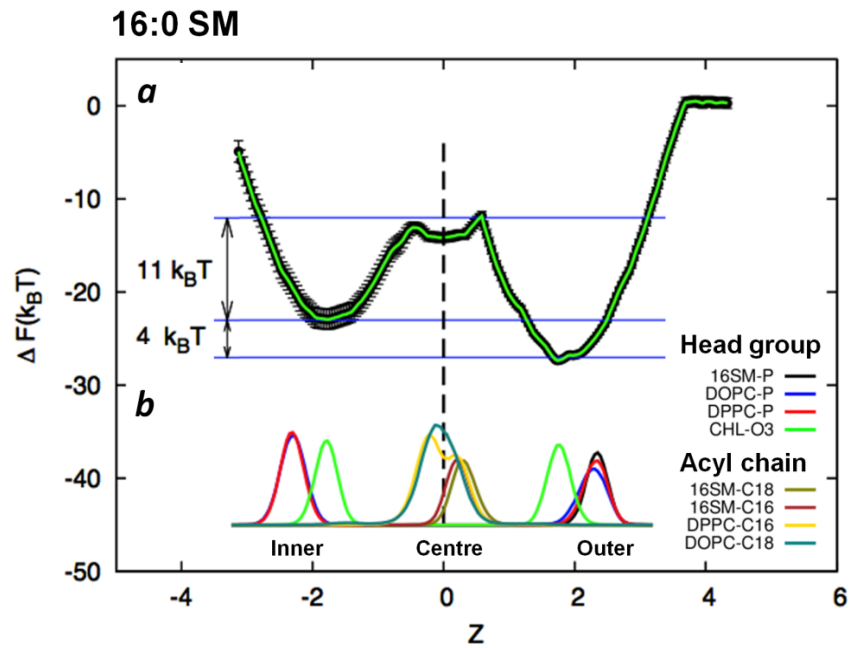

3

4

1

2 **Supplementary Figure 8**

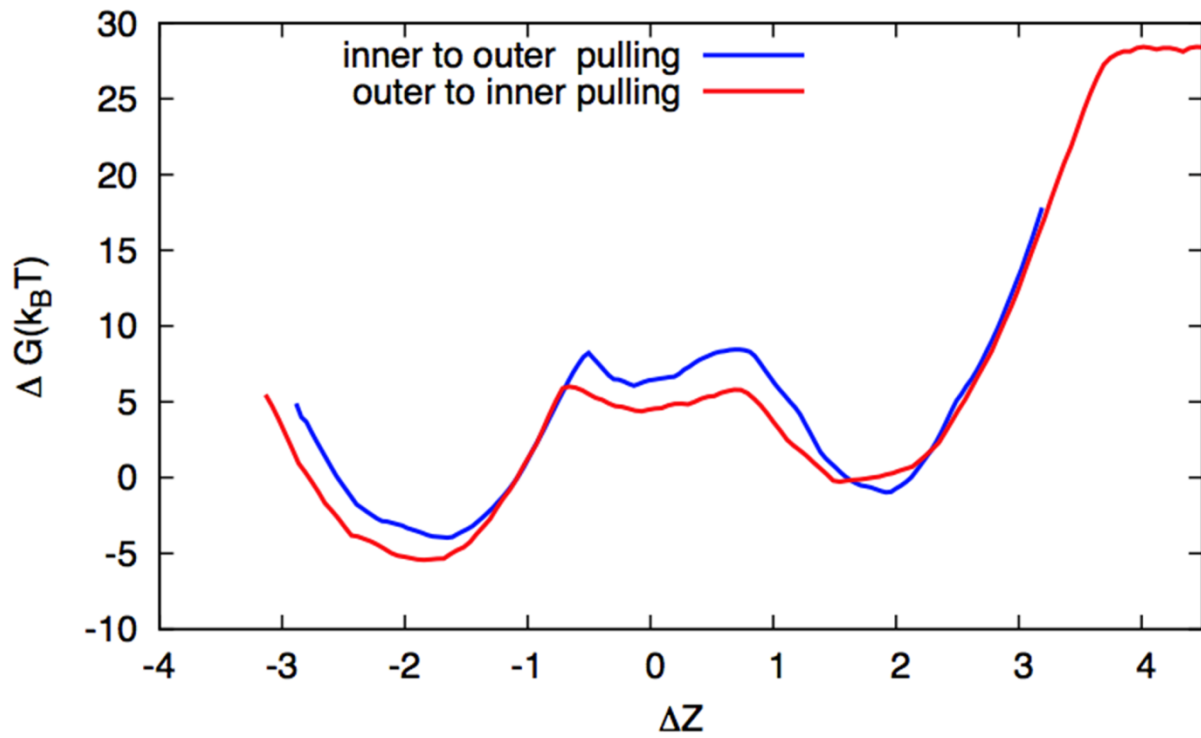

3

4

1  
2 **Supplementary Figure 9**

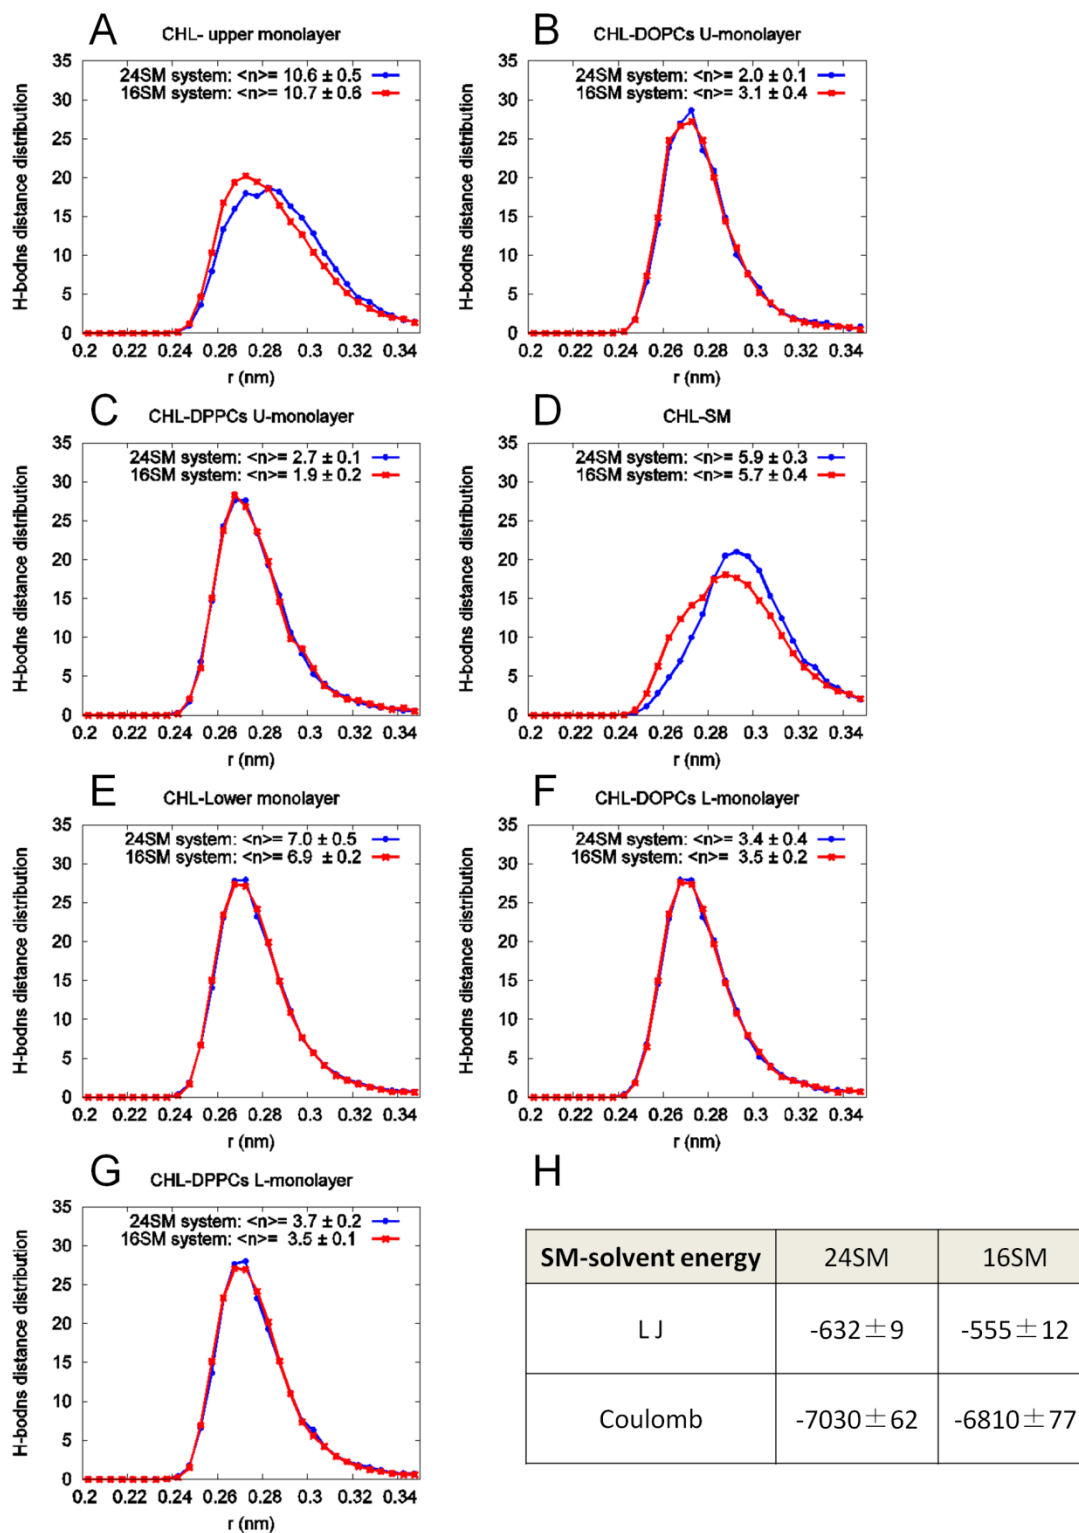

3  
4

1

2 **Supplementary Figure 10**

**A**

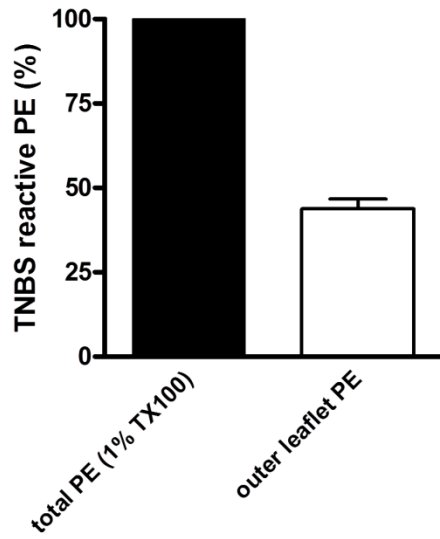

**B**

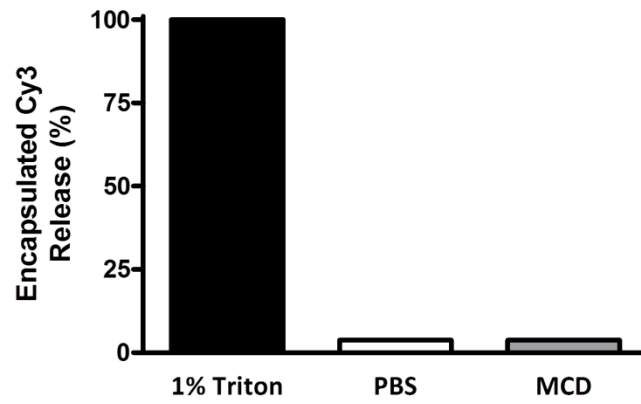

3

4

1  
2 **Supplementary Figure 11**

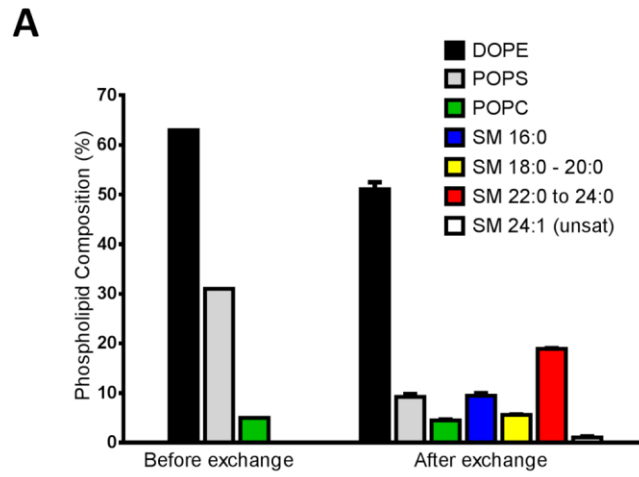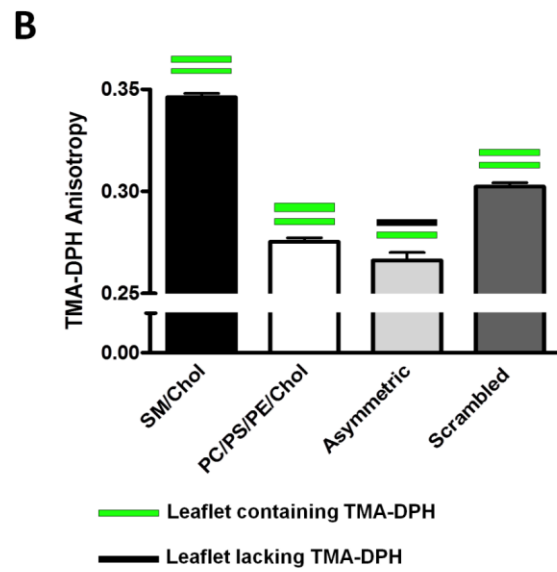

3

4



1

2 **Supplementary Figure 12**

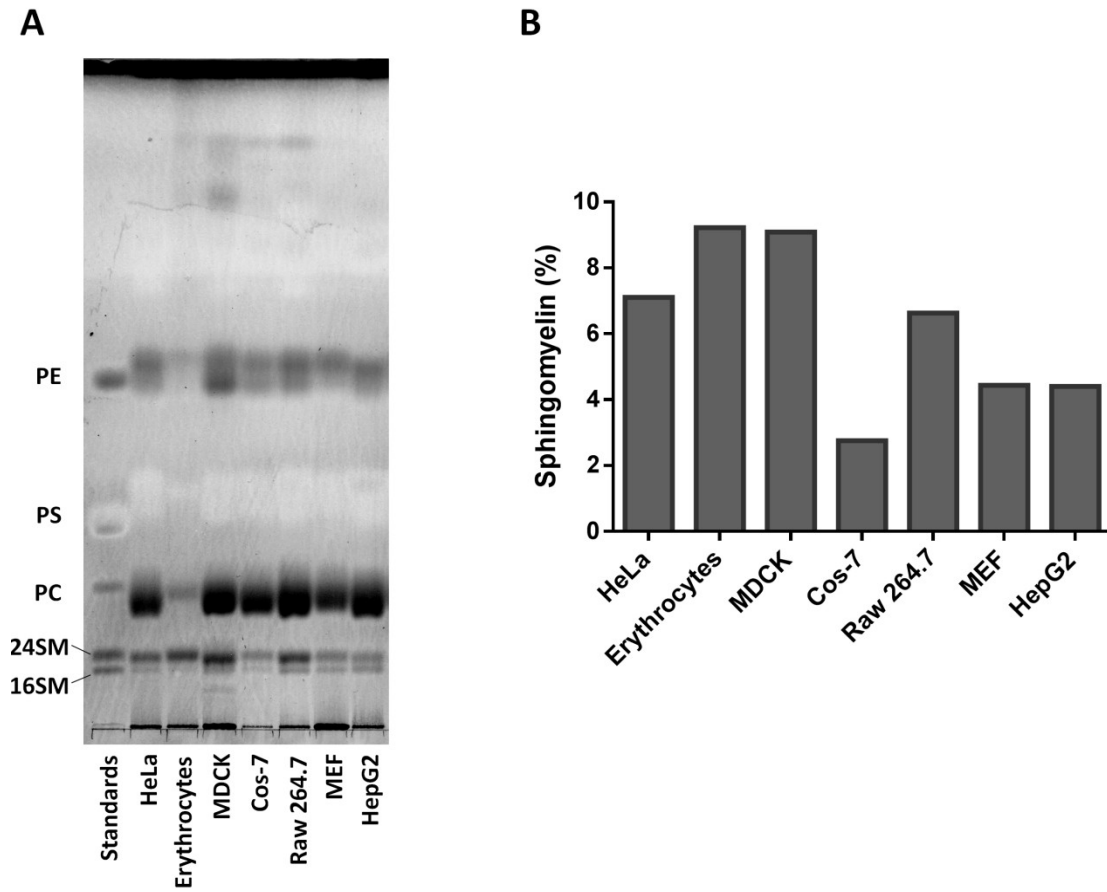

3

4

1

2 **Supplementary Figure 13**

**A**

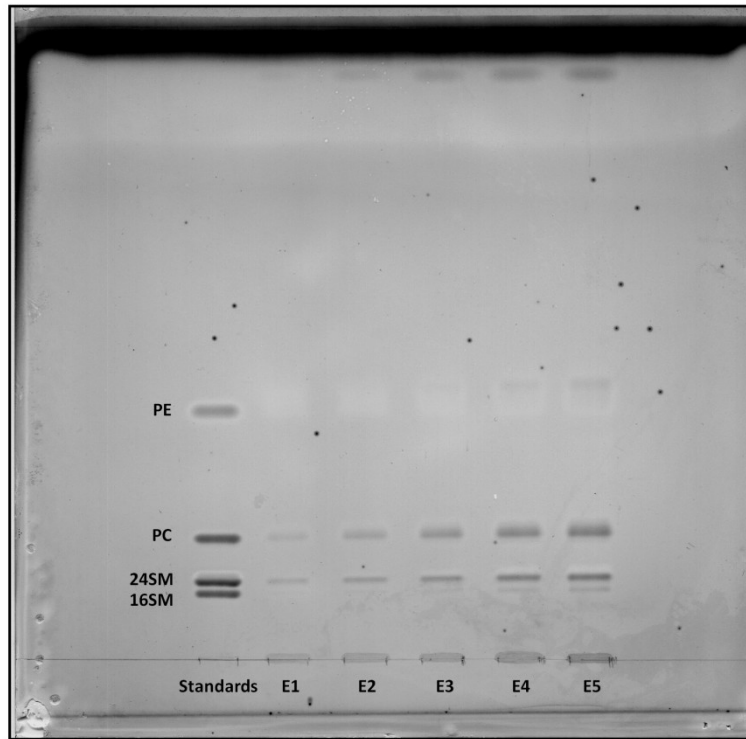

**B**

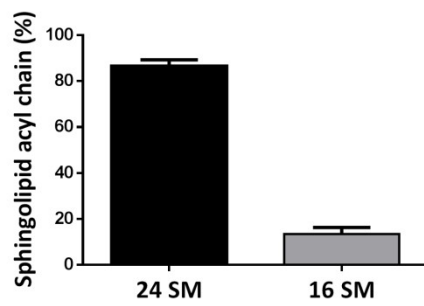

**C**

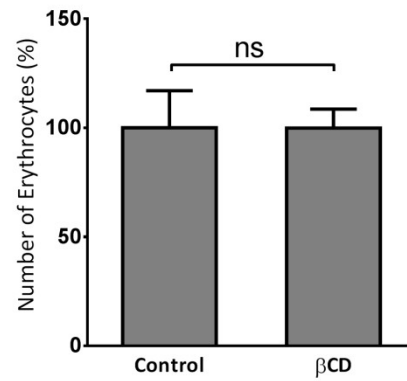

3

4

5

1

## 2 **Supporting information**

3

## 4 **Materials and Methods**

5

### 6 Cell culture

7 HeLa cells were cultured in Dulbecco's Modified Eagle Medium (DMEM) supplemented  
8 with 10% fetal bovine serum and 1 % antibiotics (penicillin and streptomycin) at 37 °C with 5 %  
9 CO<sub>2</sub>. For some experiments, the culture medium was changed to serum-free DMEM  
10 supplemented with 1 mg/mL bovine serum albumin overnight.

### 11 GUV preparation

12 Symmetric GUVs containing 0.05 % rhodamine-DPPE were created by depositing 2.5 μL  
13 of 330 μM lipids dissolved in chloroform:methanol (95:5) onto two 3 cm long platinum wires  
14 positioned 3 mm apart (41). Organic solvent was evaporated away under a stream of nitrogen gas  
15 and then the wires were placed in a vacuum desiccator for at least 1 hour. The platinum wire  
16 was then submerged into approximately 1 mL of 30 mM sucrose solution at 70 °C and connected  
17 to a digital PM5193 programmable synthesizer/ function generator producing an A/C sine wave  
18 at 10 Hz and 3 V for 90 minutes. For symmetric GUVs, the vesicles also contained 0.1 % NBD-  
19 DPPE. For microscopy purposes, the sucrose encapsulated vesicles were diluted into 30 mM  
20 glucose solution in order to settle the vesicles onto the bottom of a microscope dish.

### 21 Asymmetric GUVs

22 Symmetric GUVs were initially generated and converted into asymmetric GUVs by outer  
23 leaflet lipid exchange by adapting a previously published protocol (17). 5 mM cholesterol-  
24 containing outer leaflet donor LUV lipids plus 0.1 % NBD-DPPE were generated in 30mM  
25 sucrose and incubated while vortexing for two hours at 55 °C in 60 mM HPα-CD.

1 DPPC/DOPC/Cholesterol (35:35:30) GUVs containing 0.05 % rhodamine-DPPE were then  
2 incubated in 20 mM of the HP $\alpha$ -CD/ donor lipid complex at 70 °C for 30 minutes. To remove  
3 excess donor lipid and HP $\alpha$ -CD, the samples were washed in 30 mM glucose by passively  
4 filtering away the donor LUVs through a membrane with 8  $\mu$ m pores and retaining the  
5 asymmetric GUVs. The resulting asymmetric GUVs were then transferred to a microscope dish.

## 6 LUV preparation

7 All lipids were stored as 50 mg/mL stocks in chloroform/methanol (95:5). 1 mM LUVs  
8 are generated by combining the desired lipid components followed by evaporating the organic  
9 solvent under nitrogen gas and subsequent vacuum desiccation for at least 60 minutes. In the  
10 case of symmetric  $^3$ H-cholesterol labeled LUVs, trace amount of  $^3$ H-cholesterol (~100 pmol/3  
11  $\mu$ mol phospholipid) was incorporated into the sample prior to desiccation. Dried lipids were  
12 then resuspended in Medium 1 (20 mM HEPES, 150 mM NaCl, 5 mM KCl, 1 mM CaCl<sub>2</sub>, 1 mM  
13 MgCl<sub>2</sub>), subjected to 5 freeze/heat cycles and extruded through a 100 nm membrane to form 100  
14 nm LUVs. For LUV isolation from the aqueous media, 1 mol% biotinylated-PE was added to  
15 lipid mixture above and resultant LUVs were incubated with streptavidin-coated agarose beads at  
16 4 °C overnight. Unbound LUVs were removed by washing the beads 3 times with Medium 1.  
17 For intermembrane exchange, two LUV populations (donor and acceptor) were similarly made  
18 with 30 % cholesterol. The donor population received trace  $^3$ H-cholesterol, was biotinylated and  
19 bound to streptavidin beads to facilitate separation from unlabelled acceptor LUVs. Before  
20 conducting MCD experiments, LUV properties were analyzed to determine the size, integrity  
21 and unilamellarity (a single bilayer).

## 22 Asymmetric LUVs

1 Asymmetric LUVs with POPC, eSM, bSM or mSM introduced into the outer leaflet and  
2 POPC/POPS/POPE (1:1:1) in the inner leaflet were generated by adapting a previously published  
3 protocol (19). Experiments were also conducted using DOPE, POPS, POPC (2:1:0.15) as the  
4 inner leaflet. Briefly, 500  $\mu$ L of 10 mM donor LUVs (POPC, eSM, bSM or mSM) in Medium 1  
5 were mixed with 100  $\mu$ L 360 mM hydroxypropyl- $\alpha$ -cyclodextrin (HP $\alpha$ -CD) and vortexed for 2  
6 hours at 55  $^{\circ}$ C. The donor- HP $\alpha$ -CD solution was then mixed with 600  $\mu$ L of 2 mM acceptor  
7 LUVs containing 25 % sucrose for 30 minutes at 55  $^{\circ}$ C to initiate outer leaflet lipid exchange.  
8 After the mixture had cooled to room temperature, the 1 mL solution was overlaid onto 4 mL 10  
9 % sucrose in Medium 1 and centrifuged at 10  $^{\circ}$ C in an NVT-100 rotor for 40 minutes at 190,000  
10 x g. After centrifugation, the excess donor- HP $\alpha$ -CD complex remains in suspension, while the  
11 sucrose-containing acceptor vesicles are collected as a pellet. Centrifugation of the resulting  
12 asymmetric vesicles was repeated a second time followed by a final resuspension in 1 mL  
13 Medium 1. When examining the effect of transbilayer asymmetry on cholesterol distribution, the  
14 10 mM LUV donor contained 1% biotinyl-PE allowing for the final asymmetric vesicles to be  
15 bound to streptavidin agarose beads.  $^3$ H-cholesterol was introduced into the asymmetric vesicles  
16 by incubation with 1 mM  $^3$ H-cholesterol donor LUVs in the presence of 1 mM  $\beta$ CD at 37  $^{\circ}$ C  
17 followed by repeated washing to remove unincorporated  $^3$ H-cholesterol. The cholesterol  
18 transbilayer distribution was determined by MCD mediated extraction, as described below.

### 19 Microscopy

20 All fluorescence images of GUVs were generated on a Nikon TE2000-E inverted  
21 fluorescent microscope with a 60x objective. Data was captured by 100-200 millisecond  
22 exposure with a Photometrics Cascade 512B CCD camera and Metamorph software. GUVs  
23 were found in the sample by searching the sample under low light conditions or by Differential

1 Interference Contrast microscopy to avoid photo-oxidation effects. Post-acquisition editing was  
2 performed using ImageJ v1.43 software.

### 3 Molecular dynamics simulations

4 All-atom MD simulations and PMF calculations was performed using GROMACS version  
5 5.1 (42, 43) and the CHARMM36 force field (FF)(44, 45). The TIP3P solvent model was  
6 used(46). Electrostatic interactions were treated with particle mesh Ewald (PME) with a short-  
7 range cutoff 1.2 nm, and van der Waals interactions were switched off between 1.0 to 1.2 nm.  
8 For all systems temperature was kept constant at 37 °C using Nose-Hoover temperature  
9 coupling(47, 48). Bonds containing hydrogen atoms were constrained using the LINCS (49)  
10 algorithm. Parrinello-Rahman barostat pressure coupling (50)( $\tau_p=1$  ps) was applied on all  
11 systems after equilibrating the systems with Berendsen pressure coupling(51). The leap-frog  
12 integrator was used with a timestep of 2 fs. The systems were built using the CHARMM-GUI  
13 membrane builder. After a short equilibration for 20ns, each simulation was continued for 500 ns  
14 for data sampling.

### 15 Potential of mean force calculation

16 PMF calculation was performed to obtain the free energy profile of cholesterol flip-flop  
17 across the bilayer normal. The model bilayer for the PMF calculation contained ~ 128 lipids. The  
18 lipid concentration was setup carefully, so that the total area of the monolayers matched as  
19 closely as possible. System composition for each system is: upper monolayer: SM (18),  
20 cholesterol (19), DOPC (15) DPPC (15), lower monolayer: cholesterol (19), DOPC (22), DPPC  
21 (23), with 6878 water molecules.

22 For each system, 40 windows were generated by pulling a cholesterol (target cholesterol)

1 molecule across the bilayer. The distance between the phosphorus atom of a specific SM  
2 molecule (reference SM) and Oxygen atom of the target cholesterol was chosen as the reaction  
3 coordinate. The maximum distance between reaction coordinates in adjacent windows is around  
4 0.2 nm. The phosphorus atom of the reference SM was restrained in the  $z$  direction (bilayer  
5 normal) by a spring potential with a spring constant of 1000 kJ/mol. The spring constant of the  
6 biasing potential is 1000 kJ/mol. Each window was simulated for 100ns, which was sufficient for  
7 the target cholesterol to sample the entire XY plane in each simulation window. Pulling a  
8 cholesterol molecule in the opposite direction (inner to outer leaflet) did not change the PMF  
9 profiles. The windows were generated using the pull option in GROMACS, by restraining the P  
10 atoms of the reference SM in the  $z$  direction. The pulling force (along  $z$ ) was applied on the O  
11 atom of the target cholesterol. In addition, to force cholesterol to flip orientation during the  
12 pulling (to save computational time) the last carbon atom of the target cholesterol was restrained  
13 (in the  $z$  direction) by a spring potential (spring constant 100 kJ/mol). This generates a torque  
14 when the cholesterol crosses the middle of the bilayer.

#### 15 Temperature controlled cholesterol extraction by MCD

16 Cholesterol flip-flop in symmetric and asymmetric LUVs was controlled by reducing the  
17 temperature to 0 °C. We developed a rather rigid protocol, which we found was absolutely  
18 necessary, in order to successfully and reproducibly prevent flip-flop. The temperature of the  
19 cholesterol extraction procedure was stringently regulated by performing the experiments in a  
20 cold room and in an ice water bath, or 0 °C water bath containing 50 % ethylene glycol.  
21 Furthermore, to prevent incidental hand warming of the samples, all manipulation of the tubes  
22 was required to be carried out with utensils similarly maintained at 0 °C. Samples, utensils and  
23 MCD media were pre-incubated at 0 °C at least one hour prior to the cholesterol extraction.

1 Without sufficient 0 °C cooling, even utensils used to rapidly transfer tubes, cholesterol flipping  
2 would occur (>50% extraction). To initiate cholesterol extraction, 5 mM MCD was added to the  
3 medium to selectively remove cholesterol from the outer leaflet of the LUVs 0 °C until  
4 cholesterol extraction reached a plateau. Similar experiments were also conducted in a 37 °C  
5 water bath. After incubation, the LUVs were separated from MCD containing medium by a brief  
6 centrifugation in 0 °C centrifuge within a cold room. The amounts of <sup>3</sup>H-cholesterol in the  
7 medium and in the LUVs are quantified by scintillation counting. Total <sup>3</sup>H-cholesterol was  
8 determined by lysing the same amount of <sup>3</sup>H-cholesterol labeled LUVs with 2% Triton X-100.

### 9 LUV intermembrane exchange

10 The assay was performed by mixing bead-bound <sup>3</sup>H-cholesterol donor LUVs with excess  
11 unlabelled acceptor LUVs (100-fold) at 37 °C, 0 °C or -5 °C in the presence of 1 mM βCD as  
12 shuttle. Outer leaflet cholesterol is exchanged between populations, until equilibrium, at 0 °C or  
13 -5 °C. Donor and acceptor LUVs are isolated by 60 second centrifugation at 1000 x g and the  
14 amount of <sup>3</sup>H-cholesterol in the acceptor LUVs is quantified.

### 15 Lipid Mass Spectrometry

16 Confirmation of outer leaflet lipid exchange in LUVs was performed by electrospray  
17 ionization tandem *mass spectrometry* (ESI-MS/MS). Asymmetric LUVs were generated as  
18 described above. The lipids were then extracted by the Bligh and Dyer method (52) in the  
19 presence of internal standards including 1,2-dieicosanoyl-sn-glycero-3-phosphocholine (PC), N-  
20 heptadecanoyl-sphingomyelin (SM), 1,2-ditetradecanoyl-sn-glycero-3-phosphoethanolamine  
21 (PE), and 1,2-ditetradecanoyl-sn-glycero-3-phosphoserine (PS). Lipid extracts from LUVs were  
22 then subjected to shotgun lipidomics in the negative ion mode using neutral loss scanning (NLS)  
23 for 50 amu (for PC), NLS for 87 amu (for PS), and product ion scanning for m/z 196 (for PE).



1 Individual lipid molecular species were quantified by comparing the ion intensity of individual  
2 molecular species to that of the lipid class internal standard following corrections for type I and  
3 type II  $^{13}\text{C}$  isotope effects.

#### 4 Asymmetric vesicle TMA-DPH anisotropy

5 Fluorescence anisotropy measurements were performed using a Photon Technology  
6 International fluorometer and FeliX software. We generated symmetric SM/cholesterol and  
7 PC/PS/PE/cholesterol vesicles as described previously with the addition of 1 mol% TMA-DPH.  
8 To generate asymmetric vesicles, SM/cholesterol was introduced into the outer leaflet of  
9 PC/PS/PE/cholesterol vesicles. During the asymmetry procedure no TMA-DPH was present in  
10 the SM/cholesterol donor vesicles. Outer leaflet TMA-DPH was then removed from  
11 PC/PS/PE/cholesterol vesicles during phospholipid exchange resulting in only inner leaflet  
12 labeling of asymmetric vesicles. Anisotropy was compared between symmetric, asymmetric and  
13 scrambled vesicles by excitation and emission at 365 nm and 425 nm, respectively.

#### 14 Erythrocyte intermembrane exchange

15 All erythrocyte work was approved by the Ottawa Health Sciences Network Research  
16 Ethics Board (#20140233-01H). Human erythrocytes were isolated from whole blood by  
17 centrifugation through Ficoll-Hypaque gradient solution. The erythrocytes were then washed 3  
18 times with PBS containing 2 mM EDTA. 100 million washed erythrocytes were incubated with  
19 20  $\mu\text{Ci}$   $^3\text{H}$ -cholesterol in 10 mL DMEM for at least 4 hours, subsequently biotinylated according  
20 to manufacturer's instructions (Fisher Scientific) and 100,000 cells were adhered to a  
21 streptavidin coated microplate. 100-fold excess unlabelled erythrocytes were added to the  
22 microplate wells in suspension with 1 mM  $\beta\text{CD}$  at 37 °C or 0 °C, until equilibrium. 75  $\mu\text{L}$  of

1 supernatant containing erythrocyte acceptor cells was removed at each time point and the amount  
2 of cholesterol transferred to the acceptors was determined by scintillation counting.

### 3 Fluorescence resonance energy transfer efficiency simulation

4 A Monte Carlo approach was used for simulations of density-dependent FRET using a  
5 program written in Fortran 95 and compiled using gfortran/gcc running in the command line  
6 interface of a computer running Mac OSX 10.8. The number of YFP and CFP molecules per  
7 1000 nm X 1000 nm square were input. YFP and CFP molecules were assigned floating-point  
8 coordinates at random within a square patch of simulated membrane using the Mersenne Twister  
9 pseudorandom number generator and units of nm. Molecules were not allowed to fall within 2.4  
10 nm of other molecules, as this is the diameter of the GFP cylinder. Once molecules were placed,  
11 FRET efficiency (E) was calculated for each CFP to every YFP within 50 nm of the CFP using  
12 the equation  $E = 1 / (1 + (r/R_0)^6)$  where r is the distance between the centers of the two molecules  
13 and  $R_0$  is 4.89 nm (53). At greater than 50 nm,  $E < 1 \times 10^{-6}$ , and FRET was not calculated for  
14 reasons of computational efficiency. Cumulative FRET efficiency from a CFP was calculated  
15 from the cumulative probability of FRET from this CFP molecule to all available YFPs.

16

$$1 - \prod_{YFPn} (1 - E_{YFPn})$$

17

18 Total FRET efficiency was calculated as the mean efficiency of FRET from all CFPs included in  
19 the simulation.

### 20 Live cell fluorescence resonance energy transfer

1 Fluorescence resonance energy transfer (FRET) was performed on HeLa cells co-  
2 transfected with mCFP- and mYFP- GPI-APs. Images were acquired with a Nikon TE2000-E  
3 inverted fluorescent microscope using a 60x objective. Data was captured on a Cascade 512B  
4 CCD camera (Photometrics) and MetaMorph software (Universal Imaging). To quantify the  
5 crosstalk between CFP and YFP channels, cells were transfected with either mCFP or mYFP  
6 plasmids and imaged identically as in FRET experiments. This generates crosstalk factors from  
7 CFP or YFP to the sensitized YFP channel,  $G_{\text{CFP}}$  and  $G_{\text{YFP}}$ , respectively. To measure the FRET,  
8 co-transfected cells were imaged with a 3-cube system:  $\text{CFP}_{\text{ex}}/\text{CFP}_{\text{em}}$  ( $I_{\text{CFP}}$ ),  $\text{CFP}_{\text{ex}}/\text{YFP}_{\text{em}}$  ( $I_{\text{S}}$ )  
9 and  $\text{YFP}_{\text{ex}}/\text{YFP}_{\text{em}}$  ( $I_{\text{YFP}}$ ). The true FRET signal,  $I_{\text{FRET}}$ , was calculated as following (54):

$$10 \quad I_{\text{FRET}} = I_{\text{S}} - G_{\text{CFP}} \times I_{\text{CFP}} - G_{\text{YFP}} \times I_{\text{YFP}}$$

11 FRET efficiency,  $E$  (%), was derived as below:

$$12 \quad E (\%) = I_{\text{FRET}} / (I_{\text{FRET}} + Q^* \times I_{\text{CFP}})$$

13 \* $Q$  is the ratio of sensitized emission,  $I_{\text{FRET}}$ , to the corresponding amount of donor (CFP) recovery in  
14  $\text{CFP}_{\text{ex}}/\text{CFP}_{\text{em}}$  channel after YFP photobleaching measured in the same cell.  $Q$  was determined  
15 experimentally using co-transfected HeLa cells. Images were acquired using the same 3-cube system  
16 and imaging parameters as the experimental images, and FRET efficiency was determined afterward  
17 for the same cells using the acceptor photobleach method (54).

18 The final  $E$  (%) data was presented after excluding outliers from the normal distribution (mean  $\pm$   
19 95% confidence interval).

20

21 The protein density of mCFP- and mYFP-GPI-AP in the HeLa cell plasma membrane was  
22 determined by imaging purified mCFP and mYFP protein in solution under identical imaging

1 conditions as the FRET experiments. Serial dilutions of the fluorescent proteins in a chamber of  
2 50  $\mu\text{m}$  thickness were imaged to produce a standard curve for fluorescent intensity as a function  
3 of protein concentration. The imaging volume was determined using the known pixel dimensions  
4 (xy) of the Cascade 512B CCD camera and by placing the fluorescent protein solutions in 50  $\mu\text{m}$   
5 thickness chambers to standardize the focal depth (z). The standard curves for the soluble  
6 fluorescent protein densities were then used to interpolate the mCFP- and mYFP-GPI-AP protein  
7 densities from the FRET experiments.

8 For sphingomyelin manipulation, the mCFP- and mYFP-GPI-APs expressing HeLa cells  
9 were treated with or without 50  $\mu\text{M}$  myriocin and fumonisin B1 for 3 days to deplete the  
10 sphingolipids. The night before microscopy experiments, the media was changed to serum free  
11 media to prevent incorporation of exogenous lipids from the fetal bovine serum into the cells. In  
12 the morning, a subset of the cells was incubated with either 16:0 SM or 24:0 SM/ $\gamma$ -CD  
13 complexes (20 $\mu\text{M}$  SM and 1mM  $\gamma$ -cyclodextrin) for 1 hour at 37  $^{\circ}\text{C}$ . Microscopy experiments  
14 were performed at approximately 12  $^{\circ}\text{C}$ . Each treatment was also accompanied by an additional  
15 dish treated with 0.2 % saponin for 30 minutes on ice before microscopy experiments. This was  
16 to compare the FRET change before and after depletion of cholesterol for each treatment.

### 17 Sphingolipid analysis

18 To confirm thorough depletion of sphingolipids by the myriocin and fumonisin b1  
19 treatment, as well as, to test the efficiency of sphingomyelin supplementation, thin layer  
20 chromatography (TLC) was performed on lipid extracts from HeLa cells. After each treatment,  
21 HeLa cells were trypsinized and washed in PBS, followed by lipid extraction (52). Lipid extracts  
22 were loaded onto the TLC plate alongside purified lipid standards to compare sphingolipid levels  
23 in all treatments. The lipids were resolved on the plate by running in a

1 chloroform/acetone/methanol/acetic acid/water (6:8:2:2:1) solvent system. The lipids were  
2 visualized by incubating the plate in a solution of 0.03 % coomassie blue G, 30% methanol and  
3 100 mM NaCl followed by destaining in 30% methanol and 100 mM NaCl. Sphingolipid content  
4 was quantified by densitometry analysis using Image J software.

#### 5 Sensitivity to sphingomyelinase

6 To validate that the re-supplied sphingolipids were successfully incorporated into the  
7 plasma membrane of the HeLa cells, we quantified sphingomyelinase-induced endocytosis of  
8 FITC-dextran (25). HeLa cells were treated either with DMSO (control) or Fumonisin B1  
9 (50 $\mu$ M) and Myriocin (50 $\mu$ M) in DMEM containing 1mg/ml BSA for 72 hours. Post drug  
10 treatment, C16 or C24 SM were added back to the cells as  $\gamma$ -cyclodextrin complexes. SM  
11 (20 $\mu$ M) and  $\gamma$ -cyclodextrin (1mM) complexes were added for 1 hour at 37 °C. To visualize  
12 endocytosis, FITC-dextran (5mg/ml) and sphingomyelinase (50mU/ml) were added to the cells  
13 for 10 minutes at 37 °C. The cells were then washed in PBS, fixed in 4% paraformaldehyde and  
14 mounted with slow-fade DAPI. Fluorescence microscopy was performed using Zeiss LSM 510  
15 confocal microscope. Intensity of FITC-dextran was measured using Image J and normalized to  
16 the DMSO control. Error bars represent standard error of the mean from three independent  
17 experiments.

#### 18 Statistical analysis

19 Statistical differences in cholesterol transbilayer distribution between different  
20 asymmetric LUVs were determined by one-way ANOVA. Post hoc comparisons were  
21 conducted relative to the mSM asymmetric sample with \* indicating  $P < 0.05$ , \*\* indicating  
22  $P < 0.01$  and \*\*\* indicating  $P < 0.001$ . For comparisons of erythrocyte number with and without  
23 cyclodextrin treatment, statistical differences were examined using an unpaired Student's *t*-test.

- 1 Non-linear regressions were performed in Graphpad Prism 5.0 and fit using the equation:
- 2  $Y=Top*(1-\exp(-K*X))$ . Error bars throughout represent standard error of the mean from 3
- 3 independent experiments.
